# Supplementary material for: Evolution of the Aging Brain Transcriptome and Synaptic Regulation
Source: PLoS One. 2008 Oct 2;3(10):e3329. doi: 10.1371/journal.pone.0003329 (PMC2553198; doi:10.1371/journal.pone.0003329)
Supplement: Table S1 — Sample information (0.03 MB XLS) [file pone.0003329.s005.xls]

## Sheet: Sheet1
Table S1: Sample information.
Column names are described below:
column name	description
Array ID	ID corresponding to the submitted CEL file
Brain Region	region of the brain from which mRNA was isolated for hybridization
Species	species from which the mRNA was isolated
Strain	if applicable, strain of the species
Age	age of the species from which the mRNA was isolated
Age Metric	metric of age (months or years)
Sex	sex of the organism from which the mRNA was isolated
PMI (hr)	Post Mortem Interval (in hours)
Array ID	Brain Region	Species	Strain	Age	Age Metric	Sex	PMI (hr)
h24y-M1	prefrontal cortex	human	N/A	24	years	M	8
h25y-F2	prefrontal cortex	human	N/A	25	years	F	11
h25y-F3	prefrontal cortex	human	N/A	25	years	F	7
h26y-M4	prefrontal cortex	human	N/A	26	years	M	8
h26y-M5	prefrontal cortex	human	N/A	26	years	M	21
h27y-F6	prefrontal cortex	human	N/A	27	years	F	18
h29y-F7	prefrontal cortex	human	N/A	29	years	F	7
h29y-M8	prefrontal cortex	human	N/A	29	years	M	18
h33y-F9	prefrontal cortex	human	N/A	33	years	F	17
h34y-F10	prefrontal cortex	human	N/A	34	years	F	2
h36y-F11	prefrontal cortex	human	N/A	36	years	F	6
h37y-M12	prefrontal cortex	human	N/A	37	years	M	18
h40y-M13	prefrontal cortex	human	N/A	40	years	M	16
h70y-M14	prefrontal cortex	human	N/A	70	years	M	2
h71y-F15	prefrontal cortex	human	N/A	71	years	F	9
h73y-M16	prefrontal cortex	human	N/A	73	years	M	12
h77y-M17	prefrontal cortex	human	N/A	77	years	M	1
h80y-M19	prefrontal cortex	human	N/A	80	years	M	4
h80y-F18	prefrontal cortex	human	N/A	81	years	F	1
h84y-M20	prefrontal cortex	human	N/A	84	years	M	2
h86y-F21	prefrontal cortex	human	N/A	86	years	F	4
h87y-F22	prefrontal cortex	human	N/A	87	years	F	4
h90y-M23	prefrontal cortex	human	N/A	90	years	M	5
h91y-F24	prefrontal cortex	human	N/A	91	years	F	18
h91y-M25	prefrontal cortex	human	N/A	91	years	M	7
h92y-M26	prefrontal cortex	human	N/A	92	years	M	12
h93y-F27	prefrontal cortex	human	N/A	93	years	F	4
h94y-F28	prefrontal cortex	human	N/A	94	years	F	5
r5y-F17	prefrontal cortex	rhesus monkey	N/A	5	years	F	0
r5y-F18	prefrontal cortex	rhesus monkey	N/A	5	years	F	0
r6y-F16	prefrontal cortex	rhesus monkey	N/A	6	years	F	0
r6y-F20	prefrontal cortex	rhesus monkey	N/A	6	years	F	0
r6y-F21	prefrontal cortex	rhesus monkey	N/A	6	years	F	0
r28y-F13	prefrontal cortex	rhesus monkey	N/A	28	years	F	0
r29y-F14	prefrontal cortex	rhesus monkey	N/A	29	years	F	0
r29y-F22	prefrontal cortex	rhesus monkey	N/A	29	years	F	0
r29y-F23	prefrontal cortex	rhesus monkey	N/A	29	years	F	0
r30y-F19	prefrontal cortex	rhesus monkey	N/A	30	years	F	0
r31y-F15	prefrontal cortex	rhesus monkey	N/A	31	years	F	0
m5m-M1	neocortex	mouse	Harlan B6C3F1/HSD	5	months	M	0
m5m-M2	neocortex	mouse	Harlan B6C3F1/HSD	5	months	M	0
m5m-M3	neocortex	mouse	Harlan B6C3F1/HSD	5	months	M	0
m5m-M4	neocortex	mouse	Harlan B6C3F1/HSD	5	months	M	0
m5m-M5	neocortex	mouse	Harlan B6C3F1/HSD	5	months	M	0
m30m-M6	neocortex	mouse	Harlan B6C3F1/HSD	30	months	M	0
m30m-M7	neocortex	mouse	Harlan B6C3F1/HSD	30	months	M	0
m30m-M8	neocortex	mouse	Harlan B6C3F1/HSD	30	months	M	0
m30m-M9	neocortex	mouse	Harlan B6C3F1/HSD	30	months	M	0
m30m-M10	neocortex	mouse	Harlan B6C3F1/HSD	30	months	M	0
neuro	progenitor cell fractions (neurons)	human	N/A	N/A	N/A	N/A	0
astroc	progenitor cell fractions (astrocytes)	human	N/A	N/A	N/A	N/A	0
microg	progenitor cell fractions (microglia)	human	N/A	N/A	N/A	N/A	0
