# Supplementary material for: Evolution of the Aging Brain Transcriptome and Synaptic Regulation
Source: PLoS One. 2008 Oct 2;3(10):e3329. doi: 10.1371/journal.pone.0003329 (PMC2553198; doi:10.1371/journal.pone.0003329)
Supplement: Table S6 — Genes with Significant Age-Related Expression Changes in Humans, Rhesus Macaques, and Mice (0.08 MB XLS) [file pone.0003329.s010.xls]

## Sheet: sheet1
Table S6: Genes with Significant Age-Related Expression Changes in Humans, Rhesus Macaques, and Mice
This table contains a list of the genes with probe IDs that exhibit a significant age-related expression change (q-value < 0.01) in all three species (human, rhesus macaque, and mouse).
The table columns are described below:
column name	description
human gene	official human gene symbol
probe set/human	probe ID on human U133plus Affymetrix microarrays
probe set/rhesus	probe ID on rhesus whole genome Affymetrix microarrays
probe set/mouse	probe ID on mouse 430 2.0 genome Affymetrix microarrays
fold change/human	age-related fold change in humans
fold change/rhesus	age-related fold change in rhesus
fold change/mouse	age-related fold change in mice
q-value(%)/human	q-value significance level in humans (as determined by Significance Analysis of Microarrays (SAM))
q-value(%)/rhesus	q-value significance level in rhesus (as determined by Significance Analysis of Microarrays (SAM))
q-value(%)/mouse	q-value significance level in mice (as determined by Significance Analysis of Microarrays (SAM))
	probe set			fold change			q-value (%)
human gene	human	rhesus	mouse	human	rhesus	mouse	human	rhesus	mouse
APOD	201525_at	MmugDNA.10643.1.S1_s_at	1416371_at	2.25075	4.00552	2.24519	0.0348594	0.855741	0.0166059
CANX	200068_s_at	Mmu.1815.1.S1_at	1415692_s_at	1.20005	1.37081	1.67712	0.0900293	0.231666	0.0567437
GPRC5B	203632_s_at	MmugDNA.31129.1.S1_at	1451411_at	1.64246	1.41163	1.41465	0.278664	0.231666	0.0166059
RPS9	214317_x_at	MmugDNA.37629.1.S1_at	1434624_x_at	1.33691	1.75382	1.26986	0.549096	0.231666	0.0283489
TPP1	200742_s_at	MmugDNA.2334.1.S1_at	1448313_at	1.49614	1.24684	1.14463	0.390124	0.437867	0.0166059
AACS	218434_s_at	MmugDNA.15428.1.S1_s_at	1423797_at	-1.5166	-1.34653	-1.45613	0.0203962	0.775129	0.411953
ADRBK2	228771_at	MmugDNA.3224.1.S1_at	1439178_at	-1.52453	-2.07719	-1.33453	0.0203962	0.855741	0.0567437
ARMC8	1555279_at	MmugDNA.19490.1.S1_at	1434950_a_at	-1.45444	-1.47169	-1.33136	0.194919	0.437867	0.0567437
ARPP-21	231935_at	MmugDNA.4420.1.S1_at	1424248_at	-1.95312	-1.45681	-1.13749	0.0203962	0.231666	0.0166059
CAMK4	229029_at	MmuSTS.2178.1.S1_at	1452572_at	-2.17434	-2.111	-1.55987	0.0203962	0.437867	0.192757
CRSP8	51176_at	MmuSTS.4161.1.S1_at	1432462_a_at	-1.17505	-1.32263	-1.3228	0.194919	0.855741	0.119564
DUSP14	203367_at	MmugDNA.24551.1.S1_at	1431422_a_at	-1.25965	-1.29646	-1.42802	0.0646032	0.855741	0.0567437
ETF1	201574_at	MmugDNA.19076.1.S1_s_at	1420024_s_at	-1.23062	-1.40915	-1.21521	0.194919	0.855741	0.411953
GFPT1	202722_s_at	MmuSTS.838.1.S1_at	1444329_at	-1.38464	-1.59997	-1.92267	0.0348594	0.63912	0.948696
GOLGA1	228174_at	MmugDNA.10569.1.S1_at	1432054_at	-1.56531	-1.54223	-1.19207	0.0203962	0.855741	0.411953
GSS	201415_at	MmugDNA.16426.1.S1_at	1441931_x_at	-1.20019	-1.53367	-1.60274	0.278664	0.437867	0.348192
KBTBD6	1553111_a_at	MmugDNA.13440.1.S1_at	1437130_at	-1.47874	-1.54777	-1.53941	0.0203962	0.536747	0.0567437
MARCH1	219574_at	MmugDNA.30126.1.S1_at	1440209_at	-1.48089	-1.36125	-1.97742	0.194919	0.63912	0.119564
MGC29898	235517_at	MmugDNA.33944.1.S1_at	1437631_at	-1.19537	-1.96688	-1.30611	0.278664	0.231666	0.776349
MPPED1	241398_at	MmugDNA.19900.1.S1_at	1459846_x_at	-1.4414	-1.45722	-1.307	0.0203962	0.943131	0.119564
PDIA6	208638_at	MmugDNA.33211.1.S1_s_at	1423648_at	-1.4355	-1.41894	-1.30288	0.0203962	0.855741	0.240375
RAB14	200927_s_at	MmugDNA.21702.1.S1_at	1419244_a_at	-1.29381	-1.54734	-1.31399	0.0348594	0.536747	0.288097
RNASEH1	218497_s_at	MmugDNA.25141.1.S1_at	1453833_a_at	-1.47798	-1.42472	-1.17445	0.0203962	0.598989	0.119564
RP5-1104E15.5	204593_s_at	MmugDNA.14393.1.S1_at	1434713_at	-1.24377	-1.3037	-1.28268	0.0203962	0.943131	0.776349
SLC35A2	209326_at	MmugDNA.30753.1.S1_at	1436664_a_at	-1.13559	-1.52532	-1.44672	0.0348594	0.437867	0.0283489
TGFBRAP1	225653_at	MmugDNA.1208.1.S1_at	1428425_at	-1.73762	-1.22573	-1.11724	0.0900293	0.775129	0.776349
TMEM14B	221452_s_at	Mmu.14179.2.S1_x_at	1416479_a_at	-1.61854	-1.87582	-1.23957	0.0203962	0.437867	0.0394365
TMEM4	209796_s_at	MmugDNA.23499.1.S1_at	1459846_x_at	-1.35117	-2.78777	-1.307	0.0203962	0.536747	0.119564
TMEM49	220990_s_at	MmugDNA.29385.1.S1_at	1421491_a_at	-1.29946	-1.53487	-1.61314	0.0203962	0.943131	0.0166059
TRIB2	202478_at	MmugDNA.35263.1.S1_at	1426640_s_at	-1.36515	-1.51969	-1.20913	0.964805	0.231666	0.948696
TRMT12	219299_at	MmugDNA.31737.1.S1_at	1430537_at	-1.22938	-1.45172	-1.53841	0.740356	0.500611	0.240375
UBE2F	225787_at	MmugDNA.37405.1.S1_at	1432426_a_at	-1.30049	-1.46656	-1.11909	0.0203962	0.53374	0.288097
UBE2Q1	217978_s_at	MmugDNA.22609.1.S1_at	1429311_at	-1.20241	-1.53431	-1.24948	0.549096	0.720397	0.639002
VEZT	223090_x_at	MmugDNA.3703.1.S1_at	1438197_at	-1.31813	-1.60764	-1.29277	0.0203962	0.943131	0.288097
ZFP64	218968_s_at	MmugDNA.6664.1.S1_at	1456431_at	-1.30364	-1.62251	-1.50805	0.0900293	0.855741	0.348192
ACAD9	224160_s_at	MmuSTS.1339.1.S1_at	1429581_at	-1.18549	-1.36364	1.40318	0.0203962	0.231666	0.0166059
ADCY2	213219_at	MmugDNA.6695.1.S1_at	1455462_at	-1.97336	-1.26437	1.10926	0.0203962	0.855741	0.192757
ADRA2A	209869_at	MmuSTS.417.1.S1_at	1423022_at	-1.59714	-2.09214	1.30551	0.0203962	0.231666	0.639002
AKT3	212607_at	MmugDNA.18089.1.S1_at	1435879_at	-1.38491	-1.15495	1.47481	0.0203962	0.879862	0.0166059
ANKRD28	226025_at	MmugDNA.454.1.S1_at	1454801_at	-1.2381	-1.50546	1.34531	0.0646032	0.855741	0.119564
ANKRD6	204671_s_at	MmugDNA.10899.1.S1_s_at	1437217_at	-1.34059	-1.36084	1.21987	0.139528	0.943131	0.0984834
ASPHD2	227015_at	MmugDNA.29618.1.S1_at	1452958_at	-1.6284	-1.49401	1.15406	0.0203962	0.231666	0.119564
ATP8A2	219659_at	MmugDNA.16893.1.S1_at	1440627_at	-1.29633	-2.771	1.27229	0.0348594	0.720397	0.948696
BICD2	212702_s_at	MmugDNA.18247.1.S1_at	1450732_a_at	-1.47039	-1.52321	1.42637	0.0203962	0.500611	0.0166059
C10orf9	224651_at	MmugDNA.4613.1.S1_at	1428413_at	-1.42515	-1.37887	1.49036	0.0203962	0.855741	0.0166059
C18orf1	207996_s_at	MmugDNA.5781.1.S1_at	1427182_s_at	-1.64962	-1.29944	1.3305	0.0203962	0.536747	0.948696
C1orf21	223125_s_at	MmugDNA.21617.1.S1_at	1455732_at	-1.30659	-1.32621	1.25946	0.0203962	0.598989	0.0166059
C3orf59	227599_at	MmugDNA.5239.1.S1_at	1439014_at	-1.41221	-1.33285	1.68916	0.0203962	0.231666	0.0166059
CALB1	205626_s_at	MmuSTS.567.1.S1_at	1448738_at	-3.72245	-1.62922	1.28131	0.0203962	0.879862	0.348192
CALU	200755_s_at	MmugDNA.39990.1.S1_at	1415870_at	-1.34365	-1.9233	1.29233	0.0348594	0.855741	0.0394365
CAMSAP1	212710_at	MmugDNA.30256.1.S1_at	1435530_at	-1.35064	-1.26706	1.45315	0.0203962	0.53374	0.0166059
CBX6	229733_s_at	MmugDNA.28393.1.S1_s_at	1424407_s_at	-2.30468	-1.19924	1.37668	0.0203962	0.943131	0.0166059
COG1	227784_s_at	MmugDNA.12788.1.S1_at	1456740_x_at	-1.25778	-1.68532	1.65925	0.0348594	0.958793	0.0166059
COG8	219575_s_at	MmugDNA.11535.1.S1_at	1451052_at	-1.55666	-1.32733	1.27376	0.0203962	0.775129	0.0166059
CSNK1G1	226888_at	MmugDNA.37189.1.S1_at	1428806_at	-1.16854	-1.42984	1.27441	0.278664	0.855741	0.0166059
CSNK2A1	212072_s_at	MmugDNA.38883.1.S1_at	1419034_at	-1.27928	-1.36659	1.57159	0.0203962	0.958793	0.0984834
CSNK2A2	224922_at	MmugDNA.34874.1.S1_at	1460646_at	-1.23135	-1.31532	1.13738	0.0203962	0.943131	0.288097
CSTF3	229666_s_at	MmugDNA.18955.1.S1_at	1424723_s_at	-1.26812	-1.14481	1.47173	0.0203962	0.53374	0.146087
DCTN4	218013_x_at	MmugDNA.3795.1.S1_at	1420861_at	-1.31952	-1.30581	1.31659	0.0900293	0.375458	0.0283489
DDX54	219111_s_at	MmugDNA.19850.1.S1_at	1438853_x_at	-1.27204	-1.27157	1.32193	0.964805	0.958793	0.0166059
DLG3	212729_at	MmugDNA.27181.1.S1_at	1416918_at	-1.60992	-1.2277	1.12354	0.0203962	0.879862	0.0845758
DOPEY2	205248_at	MmugDNA.16327.1.S1_at	1428330_at	-1.453	-1.66664	1.27188	0.0348594	0.231666	0.0166059
DTX4	212611_at	MmugDNA.5353.1.S1_at	1436545_at	-1.17958	-1.25351	1.31449	0.0203962	0.598989	0.0166059
DYRK2	202971_s_at	MmugDNA.43440.1.S1_at	1428637_at	-1.42215	-1.82073	1.25136	0.194919	0.231666	0.0394365
EIF3S12	212716_s_at	MmugDNA.28520.1.S1_at	1452674_a_at	-1.29415	-2.17401	1.18674	0.0203962	0.500611	0.119564
FLJ20701	219093_at	MmugDNA.31648.1.S1_at	1436999_at	-1.44196	-1.20767	1.17486	0.0203962	0.720397	0.146087
FUS	1565717_s_at	MmugDNA.6275.1.S1_at	1455831_at	-1.74274	-1.53541	1.14456	0.0203962	0.958793	0.411953
GALNT2	223991_s_at	MmugDNA.7950.1.S1_at	1452182_at	-1.2023	-1.15496	1.38781	0.390124	0.536747	0.0166059
GOSR2	210009_s_at	MmugDNA.8400.1.S1_at	1419372_at	-1.21626	-1.40426	1.54509	0.390124	0.958793	0.639002
HLF	204755_x_at	MmugDNA.25363.1.S1_at	1434735_at	-1.85065	-1.24959	1.33676	0.0203962	0.63912	0.0166059
HMGCR	202539_s_at	MmuSTS.4344.1.S1_at	1427229_at	-1.86595	-1.36711	1.46927	0.0203962	0.231666	0.288097
IDH2	210045_at	MmugDNA.30488.1.S1_at	1450048_a_at	-1.2998	-1.53787	1.29172	0.964805	0.720397	0.0567437
IPO11	234304_s_at	MmugDNA.36948.1.S1_at	1428096_at	-1.40849	-1.35794	1.33413	0.194919	0.879862	0.0166059
KBTBD7	223412_at	MmugDNA.13440.1.S1_at	1452700_s_at	-1.32703	-1.54777	1.22644	0.0203962	0.536747	0.0166059
KIAA1217	235282_at	MmugDNA.38838.1.S1_at	1426237_at	-1.24705	-1.95274	1.32837	0.964805	0.63912	0.240375
KIAA1698	53968_at	MmugDNA.14407.1.S1_at	1434011_a_at	-1.15664	-1.40503	1.37979	0.278664	0.53374	0.0166059
KIAA1944	236377_at	MmugDNA.29950.1.S1_at	1446492_at	-1.68722	-1.67269	1.169	0.0203962	0.231666	0.948696
KLHDC3	214383_x_at	MmugDNA.8492.1.S1_at	1454747_a_at	-1.25174	-1.25521	1.19358	0.139528	0.720397	0.192757
KPNA6	212103_at	MmugDNA.12868.1.S1_at	1426796_at	-1.36245	-1.45231	1.36995	0.0900293	0.958793	0.0166059
LANCL2	222561_at	MmugDNA.24017.1.S1_at	1450028_a_at	-1.43959	-1.37969	1.11301	0.0203962	0.63912	0.639002
LOC119710	228249_at	MmugDNA.34714.1.S1_at	1416824_at	-1.34169	-1.44338	1.15238	0.0203962	0.775129	0.146087
LOC151194	235177_at	MmugDNA.18958.1.S1_at	1449274_at	-1.83753	-1.47936	1.12712	0.0203962	0.500611	0.240375
MAGI1	225474_at	MmugDNA.8616.1.S1_at	1427246_at	-1.44972	-1.36353	1.16724	0.0203962	0.63912	0.500155
MED8	213126_at	MmugDNA.41890.1.S1_at	1431423_a_at	-1.28194	-1.37624	1.1308	0.0203962	0.437867	0.192757
MFAP1	203406_at	MmugDNA.37289.1.S1_at	1449444_a_at	-1.2209	-1.34669	1.27984	0.0900293	0.500611	0.0166059
MKRN1	209845_at	MmugDNA.39718.1.S1_at	1451425_a_at	-1.29534	-1.22435	1.08484	0.0203962	0.536747	0.500155
MTA3	226852_at	MmugDNA.6941.1.S1_at	1443350_at	-1.27619	-1.29906	1.2684	0.390124	0.958793	0.0166059
NFIB	230291_s_at	MmugDNA.22444.1.S1_at	1434102_at	-1.45045	-1.23012	1.20932	0.194919	0.855741	0.348192
NMT1	201157_s_at	MmugDNA.33761.1.S1_at	1454941_at	-1.26218	-1.17444	1.33983	0.0900293	0.943131	0.0166059
NPTX2	213479_at	MmugDNA.41632.1.S1_at	1420720_at	-2.34017	-1.81498	1.3232	0.0203962	0.879862	0.0166059
NPTXR	213040_s_at	MmugDNA.28393.1.S1_s_at	1450147_at	-1.40716	-1.19924	1.31018	0.0900293	0.943131	0.288097
NRG3	229233_at	MmugDNA.6133.1.S1_at	1421017_at	-1.49094	-1.29349	1.21628	0.0203962	0.958793	0.0166059
OPN3	219032_x_at	MmugDNA.15364.1.S1_at	1417677_at	-1.47759	-1.42957	1.26837	0.0203962	0.943131	0.0567437
PA2G4	214794_at	Mmu.10602.2.S1_at	1420142_s_at	-1.30291	-1.76115	1.1859	0.0900293	0.775129	0.0283489
PAK7	210721_s_at	MmugDNA.26167.1.S1_at	1440981_at	-1.45495	-1.34291	1.53383	0.0203962	0.958793	0.0166059
PCSK2	204869_at	MmugDNA.869.1.S1_at	1447991_at	-1.39864	-1.28049	1.24284	0.0203962	0.231666	0.146087
PDCD8	205512_s_at	MmugDNA.4872.1.S1_at	1417529_at	-1.39745	-1.50695	1.26472	0.0203962	0.855741	0.0166059
PDE4DIP	205872_x_at	MmuSTS.4214.1.S1_at	1417315_at	-1.63969	-1.33298	1.2923	0.194919	0.53374	0.0567437
PDE8B	213228_at	MmuSTS.1082.1.S1_at	1435741_at	-1.23585	-1.96359	1.32928	0.139528	0.855741	0.0166059
PLCL2	213309_at	MmuSTS.3198.1.S1_at	1426450_at	-1.76963	-1.56605	1.16343	0.0203962	0.375458	0.0166059
PPP3CB	202432_at	MmugDNA.25461.1.S1_at	1428473_at	-1.72476	-1.07355	1.20177	0.0203962	0.720397	0.0394365
PTPN3	203997_at	MmugDNA.2403.1.S1_at	1455450_at	-1.53773	-1.70126	1.20079	0.0203962	0.855741	0.948696
RAB22A	213405_at	MmugDNA.40901.1.S1_at	1451379_at	-1.34452	-1.76641	1.30263	0.0203962	0.524484	0.0567437
RALA	214435_x_at	MmugDNA.29284.1.S1_at	1423137_at	-1.20748	-1.69005	1.23958	0.964805	0.231666	0.0166059
RASGRP1	205590_at	MmugDNA.43254.1.S1_at	1434295_at	-1.52527	-1.64772	1.15033	0.0203962	0.231666	0.0984834
RASSF5	223322_at	MmugDNA.25243.1.S1_at	1422638_s_at	-1.22239	-1.41623	1.30375	0.964805	0.524484	0.0166059
RBJ	223504_at	MmugDNA.12571.1.S1_at	1435117_a_at	-1.27037	-1.32477	1.13082	0.0203962	0.855741	0.948696
RICS	229648_at	MmugDNA.187.1.S1_at	1438451_at	-1.43664	-1.50673	1.1409	0.0646032	0.879862	0.240375
RNF41	201962_s_at	MmugDNA.15756.1.S1_at	1432003_a_at	-1.29922	-2.3334	1.28616	0.139528	0.375458	0.0567437
ROCK2	202762_at	MmuSTS.3211.1.S1_at	1423592_at	-1.32275	-1.77286	1.28913	0.0203962	0.231666	0.119564
RP11-98F14.6	219940_s_at	MmugDNA.9233.1.S1_at	1435586_at	-1.20489	-1.41095	1.31181	0.964805	0.943131	0.348192
RTN4RL1	230700_at	MmugDNA.40592.1.S1_at	1455664_at	-1.37838	-1.36876	1.18708	0.0203962	0.958793	0.288097
SCG3	219196_at	MmuSTS.4289.1.S1_at	1448628_at	-1.40121	-1.25527	1.12541	0.0203962	0.720397	0.500155
SERBP1	217725_x_at	MmugDNA.12310.1.S1_at	1418563_at	-1.25747	-1.30295	1.14331	0.0348594	0.943131	0.240375
SFXN4	229236_s_at	MmugDNA.29813.1.S1_s_at	1418873_at	-1.24682	-1.23338	1.18223	0.0203962	0.63912	0.639002
SGTB	232084_at	MmugDNA.17918.1.S1_at	1437977_at	-1.4453	-1.80626	1.31627	0.0900293	0.958793	0.0166059
SIPA1L2	233587_s_at	MmugDNA.15478.1.S1_at	1434261_at	-1.51987	-2.29289	1.1891	0.0203962	0.231666	0.500155
SLC35B4	225881_at	MmugDNA.1406.1.S1_at	1416549_at	-1.40276	-1.7804	1.3406	0.0203962	0.536747	0.0166059
SLC36A1	213119_at	MmugDNA.27730.1.S1_at	1428793_at	-1.4815	-1.86029	1.2352	0.0646032	0.231666	0.146087
SNRPA1	206055_s_at	MmugDNA.15582.1.S1_s_at	1417351_a_at	-1.52814	-1.21703	1.25021	0.0203962	0.943131	0.146087
TACC1	217437_s_at	MmugDNA.14113.1.S1_at	1429590_at	-1.28803	-1.94541	1.96778	0.0348594	0.536747	0.0166059
THUMPD3	223804_s_at	MmugDNA.1901.1.S1_at	1417684_at	-1.28526	-1.64775	1.17528	0.0900293	0.63912	0.0984834
TPBG	203476_at	MmugDNA.14009.1.S1_s_at	1423310_at	-1.80933	-1.98831	1.56302	0.0203962	0.437867	0.0166059
TRAF3	221571_at	MmugDNA.10177.1.S1_at	1418587_at	-1.44661	-1.49784	1.11187	0.278664	0.231666	0.776349
TRIB1	226576_at	MmuSTS.4124.1.S1_at	1435694_at	-1.35879	-1.75824	1.51871	0.278664	0.53374	0.0166059
TRIM44	217759_at	MmuSTS.2893.1.S1_at	1421870_at	-1.38687	-2.42996	1.20099	0.0203962	0.943131	0.0166059
TRNT1	222754_at	MmugDNA.906.1.S1_at	1423095_s_at	-1.2195	-1.67258	1.13656	0.0646032	0.536747	0.288097
TTL	224908_s_at	MmugDNA.27579.1.S1_at	1451630_at	-1.96437	-1.52716	1.19822	0.0203962	0.598989	0.0567437
TUBA1	212242_at	MmuSTS.4681.1.S1_at	1417373_a_at	-1.48602	-1.28934	1.0671	0.0203962	0.437867	0.948696
UCHL5	219960_s_at	MmugDNA.20939.1.S1_at	1455086_at	-1.49169	-1.99924	1.3573	0.0203962	0.775129	0.0283489
UXS1	225583_at	MmugDNA.35140.1.S1_at	1452011_a_at	-1.31479	-1.94326	1.55819	0.278664	0.231666	0.0166059
WDR32	222804_x_at	MmuSTS.187.1.S1_at	1438727_at	-1.37796	-1.36437	1.32398	0.139528	0.958793	0.0567437
YIPF3	216338_s_at	Mmu.6387.1.S1_s_at	1451284_at	-1.14288	-1.70294	1.53985	0.964805	0.598989	0.0166059
ZDHHC4	220261_s_at	MmugDNA.5185.1.S1_s_at	1432136_s_at	-1.37011	-1.99473	1.18135	0.0203962	0.63912	0.146087
ZNF148	203319_s_at	MmugDNA.15694.1.S1_at	1418381_at	-1.42021	-1.33556	1.31965	0.0203962	0.598989	0.0166059
ZNF291	209741_x_at	MmugDNA.20116.1.S1_at	1435930_at	-1.20482	-1.34156	1.45826	0.278664	0.943131	0.0166059
ZNF436	226114_at	MmugDNA.42182.1.S1_at	1425231_a_at	-1.2486	-1.37931	1.12222	0.194919	0.231666	0.192757
ZNF697	227080_at	MmugDNA.26527.1.S1_at	1440999_at	-1.29542	-1.54326	1.1928	0.278664	0.524484	0.0567437
ADD3	201034_at	Mmu.5034.1.S1_s_at	1456162_x_at	1.53996	1.32877	-1.28874	0.0646032	0.598989	0.0845758
ABHD14A	210006_at	MmugDNA.35697.1.S1_at	1441945_s_at	-1.19154	1.31824	1.40413	0.390124	0.500611	0.0166059
CDC42	214230_at	MmugDNA.23516.1.S1_at	1460708_s_at	-1.68848	1.60831	1.18551	0.0203962	0.524484	0.0166059
CLTC	200614_at	MmugDNA.24668.1.S1_at	1454626_at	-1.43817	1.05631	1.20732	0.0203962	0.375458	0.0567437
EIF1AX	201018_at	MmugDNA.41569.1.S1_at	1419736_a_at	-1.17451	2.76239	1.27794	0.740356	0.231666	0.146087
FBXO28	202271_at	MmugDNA.2220.1.S1_at	1427069_at	-1.30086	1.70065	1.15518	0.0203962	0.231666	0.146087
MAGEH1	218573_at	MmugDNA.3012.1.S1_s_at	1422498_at	-1.50362	1.69696	1.20295	0.0203962	0.231666	0.776349
MASA	217956_s_at	Mmu.16121.1.S1_s_at	1437327_x_at	-1.32308	1.61799	1.15821	0.0203962	0.524484	0.948696
SARS	200802_at	Mmu.8222.1.S1_at	1426257_a_at	-1.45262	1.37547	1.64991	0.0203962	0.500611	0.0166059
FLJ11155	1562608_at	Mmu.1595.1.S1_at	1456583_x_at	1.8682	-3.53857	-1.17246	0.139528	0.958793	0.0845758
CRTAP	1555889_a_at	MmugDNA.7884.1.S1_at	1448592_at	1.33762	-1.66528	1.15905	0.549096	0.958793	0.288097
LRRC8A	224624_at	MmugDNA.5355.1.S1_at	1434694_at	1.39733	-1.77402	1.27499	0.740356	0.720397	0.0166059
MTF2	209705_at	MmugDNA.29388.1.S1_s_at	1418515_at	1.21468	-1.40562	1.08362	0.549096	0.943131	0.639002
NTRK2	221796_at	MmugDNA.17522.1.S1_at	1420838_at	1.7955	-1.52823	1.29402	0.0203962	0.598989	0.0166059
RDX	204969_s_at	MmugDNA.33492.1.S1_at	1416179_a_at	1.5533	-1.52036	1.3263	0.0900293	0.437867	0.192757
SAP18	208742_s_at	MmugDNA.3754.1.S1_at	1419445_s_at	-1.14515	1.312	-1.18268	0.139528	0.500611	0.948696
