# Supplementary material for: Evolution of the Aging Brain Transcriptome and Synaptic Regulation
Source: PLoS One. 2008 Oct 2;3(10):e3329. doi: 10.1371/journal.pone.0003329 (PMC2553198; doi:10.1371/journal.pone.0003329)
Supplement: Table S7 — Concordant Expression Patterns in Cultured Human Cortical Cell Types and the Allen Brain Atlas (0.07 MB XLS) [file pone.0003329.s011.xls]

## Sheet: Sheet1
Table S7: Data for Fig. S1 on Concordant Expression Patterns in Cultured Human Cortical Cell Types and the Allen Brain Atlas
This table contains the hybridization intensities and fold-enrichment calculations for 293 cell type-specific genes represented in both the Allen Brain Atlas cell-type analysis and the Affymetrix U133plus microarrays of isolated human cortical cell types. The aim is to determine whether enrichment of gene expression in a particular cell-type in mouse was indicative of its enrichment in the same c…
The columns in the table are as follows:
column name	description
Mouse Cell Type Data	The mouse neuronal cell-type in which the Allen Brain Atlas declares that a gene is enriched, based on in-situ hybridization
Human Gene	The official gene symbol
Human Fold Enrichment/microglia	The fold enrichment of a gene in human microglia - calculated as: (microglia intensity)/max(neuron intensity, astrocyte intensity)
Human Fold Enrichment/neurons	The fold enrichment of a gene in humanneurons - calculated as: (neuron intensity)/max(microglia intensity, astrocyte intensity)
Human Fold Enrichment/astrocytes	The fold enrichment of a gene in human astrocytes - calculated as: (astrocyte intensity)/max(neuron intensity, microglia intensity)
Human Intensity/microglia	Hybridization intensity of a gene in human microglia
Human Intensity/neurons	Hybridization intensity of a gene in human neurons
Human Intensity/astrocytes	Hybridization intensity of a gene in human astrocyte
		Human Fold Enrichment			Human Intensity
Mouse Cell Type Data	Human Gene	microglia	neurons	astrocytes	microglia	neurons	astrocytes
Astrocyte-enriched	ALDOC	0.399427	0.2201	2.50359	543.7	299.6	1361.2
Astrocyte-enriched	APOE	3.76287	0.021203	0.265755	23713.6	502.8	6302
Astrocyte-enriched	AQP4	0.00251058	0.0108236	92.391	33.1	142.7	13184.2
Astrocyte-enriched	ATP1A2	0.00116877	0.0203128	49.2302	10.8	187.7	9240.5
Astrocyte-enriched	ATP1A4	0.652174	0.695652	1.4375	43.5	46.4	66.7
Astrocyte-enriched	BCAN	0.0554854	0.176747	5.6578	206.5	657.8	3721.7
Astrocyte-enriched	C1QA	157.024	0.00636844	0.00586625	22501.6	143.3	132
Astrocyte-enriched	CD63	1.63022	0.196853	0.613415	28450.7	5600.6	17452.1
Astrocyte-enriched	CLDN5	0.38157	0.182935	2.62075	55.9	26.8	146.5
Astrocyte-enriched	CLU	0.00268093	0.0341885	29.2496	80.8	1030.4	30138.8
Astrocyte-enriched	CSPG3	0.00178443	0.38696	2.58425	35.6	7720	19950.4
Astrocyte-enriched	CST3	1.60621	0.0600754	0.622582	32713.9	1965.3	20367.1
Astrocyte-enriched	DBI	0.49756	0.268762	2.00981	9881.7	5337.7	19860.3
Astrocyte-enriched	EDG1	1.99695	0.00314092	0.500764	1178	3.7	589.9
Astrocyte-enriched	EMX2	0.00139704	0.39641	2.52264	2	567.5	1431.6
Astrocyte-enriched	GFAP	0.000477155	0.0252658	39.5793	12.2	646	25568.2
Astrocyte-enriched	GJA1	0.00173495	0.0856333	11.6777	10.9	538	6282.6
Astrocyte-enriched	GLDC	0.0111119	0.422815	2.3651	15.8	601.2	1421.9
Astrocyte-enriched	GLUL	2.141	0.205676	0.467072	22412.4	4609.7	10468.2
Astrocyte-enriched	GPR37L1	0.0469116	0.0625489	15.9875	6	8	127.9
Astrocyte-enriched	GSN	4.37389	0.0388403	0.228629	10561.2	410.2	2414.6
Astrocyte-enriched	ID3	0.0575148	0.168588	5.93163	1005.9	2948.5	17489.4
Astrocyte-enriched	ITGAM	45.6414	0.02191	0.0160396	4326.8	94.8	69.4
Astrocyte-enriched	ITGB5	1.43543	0.0226989	0.696657	6176.5	140.2	4302.9
Astrocyte-enriched	MAGI1	0.0491046	1.10595	0.904198	153	3115.8	2817.3
Astrocyte-enriched	MATN4	0.151013	1.2299	0.813076	16.4	108.6	88.3
Astrocyte-enriched	MFGE8	0.00937031	0.241701	4.13735	17.5	451.4	1867.6
Astrocyte-enriched	MLPH	1.53553	0.651242	0.439605	293.9	191.4	129.2
Astrocyte-enriched	PLA2G7	165.583	0.00407708	0.00603927	13097.6	53.4	79.1
Astrocyte-enriched	PPAP2B	0.0685656	0.172261	5.80515	425.1	1068	6199.9
Astrocyte-enriched	PRDX6	0.460754	0.214918	2.17035	4321.6	2015.8	9379.4
Astrocyte-enriched	SEPT4	0.0686715	0.809246	1.23572	15.3	180.3	222.8
Astrocyte-enriched	SLC6A20	0.711864	1.40476	0.558263	67.2	94.4	52.7
Astrocyte-enriched	SOX8	0.00190414	0.974141	1.02655	9.3	4757.8	4884.1
Astrocyte-enriched	SPARC	0.280912	0.168008	3.55984	2899.6	1734.2	10322.1
Astrocyte-enriched	SPARCL1	0.0149909	0.0255345	39.1626	50.9	86.7	3395.4
Astrocyte-enriched	STAB1	92.3143	0.00686612	0.0108326	40590.6	278.7	439.7					.
Choroid Plexus-enriched	ABCA4	0.204657	1.53962	0.64951	16.7	81.6	53
Choroid Plexus-enriched	ACAA2	1.43998	0.341753	0.694453	2704	924.1	1877.8
Choroid Plexus-enriched	ACACB	1.09732	0.794166	0.911311	421.7	334.9	384.3
Choroid Plexus-enriched	ACAD8	0.577459	0.647497	1.54441	1147.7	1286.9	1987.5
Choroid Plexus-enriched	ACE	4.672	0.0844749	0.214041	175.2	14.8	37.5
Choroid Plexus-enriched	ALS2CR4	0.207576	0.687614	1.4543	192.9	639	929.3
Choroid Plexus-enriched	ATP6V0E	4.5025	0.0817086	0.222099	21500.8	1756.8	4775.3
Choroid Plexus-enriched	CAB39L	0.458927	1.29749	0.770718	379.9	827.8	638
Choroid Plexus-enriched	CALML4	5.43816	0.118146	0.183886	1604.8	189.6	295.1
Choroid Plexus-enriched	CCND3	0.745807	0.645608	1.34083	1049.5	908.5	1407.2
Choroid Plexus-enriched	CDH3	0.0264784	16.3022	0.0613416	12	453.2	27.8
Choroid Plexus-enriched	CFH	1.34224	0.222637	0.745025	80.4	17.9	59.9
Choroid Plexus-enriched	CLDN1	3.31974	0.25404	0.301228	309.4	78.6	93.2
Choroid Plexus-enriched	CLDN2	0.536492	1.86396	0.355954	41.9	78.1	27.8
Choroid Plexus-enriched	COL8A1	0.0641299	0.0870144	11.4924	24.1	32.7	375.8
Choroid Plexus-enriched	COL8A2	3.375	0.296296	0.22262	251.1	74.4	55.9
Choroid Plexus-enriched	COL9A3	0.00824417	2.30065	0.434661	4.7	570.1	247.8
Choroid Plexus-enriched	CSRP2	0.00494829	3.68556	0.271329	76.6	15480.1	4200.2
Choroid Plexus-enriched	CTSC	54.8823	0.00431474	0.0182208	29318.1	126.5	534.2
Choroid Plexus-enriched	DNALI1	0.1132	0.352047	2.84053	135.5	421.4	1197
Choroid Plexus-enriched	DUSP22	3.93886	0.159031	0.25388	2673.7	425.2	678.8
Choroid Plexus-enriched	EFS	0.0135202	1.59224	0.628047	13.7	1013.3	636.4
Choroid Plexus-enriched	ELOVL7	0.107509	0.162116	6.16842	6.3	9.5	58.6
Choroid Plexus-enriched	EPHX1	0.308888	0.128663	3.23742	1025.6	427.2	3320.3
Choroid Plexus-enriched	F13A1	464.408	0.00122149	0.00215328	33483.8	40.9	72.1
Choroid Plexus-enriched	F5	1.39634	0.550218	0.716157	68.7	37.8	49.2
Choroid Plexus-enriched	FADS1	0.738337	0.752595	1.32874	1351.6	1377.7	1830.6
Choroid Plexus-enriched	FHAD1	1.13067	0.627507	0.884432	209.4	131.4	185.2
Choroid Plexus-enriched	FOLR1	0.396628	0.35315	2.52125	44.7	39.8	112.7
Choroid Plexus-enriched	FXYD1	0.0460611	0.348687	2.8679	10.7	81	232.3
Choroid Plexus-enriched	FZD4	0.0731356	1.41409	0.70717	25.4	347.3	245.6
Choroid Plexus-enriched	GC	1.48649	0.672727	0.181818	5.5	3.7	1
Choroid Plexus-enriched	GGH	0.318803	0.672101	1.48787	557.3	1174.9	1748.1
Choroid Plexus-enriched	HEMK1	1.43213	0.460944	0.698262	569.7	262.6	397.8
Choroid Plexus-enriched	ITGB5	1.43543	0.0226989	0.696657	6176.5	140.2	4302.9
Choroid Plexus-enriched	KCNE2	0.268722	2.06364	0.484581	6.1	22.7	11
Choroid Plexus-enriched	KDR	0.587031	0.532423	1.70349	51.6	46.8	87.9
Choroid Plexus-enriched	KIF9	0.393368	0.479145	2.08705	266.9	325.1	678.5
Choroid Plexus-enriched	KL	2.90909	0.0798611	0.34375	28.8	2.3	9.9
Choroid Plexus-enriched	LBP	0.151579	0.138947	6.59722	14.4	13.2	95
Choroid Plexus-enriched	LEPR	1.94106	0.347411	0.515183	5368	1864.9	2765.5
Choroid Plexus-enriched	LGALS3BP	0.18461	0.304263	3.28663	735.8	1212.7	3985.7
Choroid Plexus-enriched	LRP10	2.45693	0.0403768	0.407011	5488.3	221.6	2233.8
Choroid Plexus-enriched	LUM	0.225083	0.45598	2.19308	27.1	54.9	120.4
Choroid Plexus-enriched	MSX1	0.39599	1.59691	0.626208	110.6	279.3	174.9
Choroid Plexus-enriched	MXRA8	0.0822001	0.491681	2.03384	108.2	647.2	1316.3
Choroid Plexus-enriched	MYO7A	15.9546	0.0495402	0.0626779	1826.8	90.5	114.5
Choroid Plexus-enriched	NEK11	0.357486	0.570971	1.7514	156.4	249.8	437.5
Choroid Plexus-enriched	NID2	0.0556793	1.32059	0.757238	2.5	44.9	34
Choroid Plexus-enriched	NOTCH2	0.485995	0.153066	2.05763	2486.4	783.1	5116.1
Choroid Plexus-enriched	NXN	0.43578	1.53153	0.652941	896.4	2057	1343.1
Choroid Plexus-enriched	OTX2	0.5033	1.11091	0.900165	61	121.2	109.1
Choroid Plexus-enriched	PBXIP1	0.491562	0.102085	2.03433	1063.2	220.8	2162.9
Choroid Plexus-enriched	PCOLCE	0.616587	0.953105	1.0492	142	219.5	230.3
Choroid Plexus-enriched	PCOLCE2	0.671848	1.4403	0.694301	38.9	57.9	40.2
Choroid Plexus-enriched	PERP	0.389011	0.688645	1.45213	53.1	94	136.5
Choroid Plexus-enriched	PGCP	3.44582	0.0808929	0.290206	1249.8	101.1	362.7
Choroid Plexus-enriched	PGPEP1	2.82872	0.23764	0.353516	900.1	213.9	318.2
Choroid Plexus-enriched	PLTP	4.45468	0.0217824	0.224483	11412.9	248.6	2562
Choroid Plexus-enriched	PRLR	2.29573	0.435591	0.407703	75.3	32.8	30.7
Choroid Plexus-enriched	RBP1	0.152292	4.13773	0.241679	1391.8	9139	2208.7
Choroid Plexus-enriched	RNASET2	45.4304	0.0220117	0.00998917	33786.6	743.7	337.5
Choroid Plexus-enriched	SLC24A5	0.022339	2.77105	0.360874	13.6	608.8	219.7
Choroid Plexus-enriched	SLC26A11	0.921403	0.429895	1.0853	1253.2	584.7	1360.1
Choroid Plexus-enriched	SLC39A12	0.0978697	0.0104971	10.2177	31.7	3.4	323.9
Choroid Plexus-enriched	SLCO1C1	0.00598285	0.0222882	44.8667	28.4	105.8	4746.9
Choroid Plexus-enriched	SOSTDC1	0.171123	2.83333	0.352941	6.4	37.4	13.2
Choroid Plexus-enriched	SPINT2	2.65389	0.376806	0.0181006	1723.7	649.5	31.2
Choroid Plexus-enriched	ST6GALNAC2	0.686564	0.589623	1.45653	1979.5	1700	2883.2
Choroid Plexus-enriched	STEAP2	0.252453	3.18466	0.314005	28.3	112.1	35.2
Choroid Plexus-enriched	STRA6	0.921612	1.08506	0.771429	125.8	136.5	105.3
Choroid Plexus-enriched	SULF1	0.167152	0.269023	3.71716	40.2	64.7	240.5
Choroid Plexus-enriched	SYNE2	0.0113641	1.09926	0.909703	59.1	5200.6	4731
Choroid Plexus-enriched	TCN2	3.3433	0.207452	0.299106	671	139.2	200.7
Choroid Plexus-enriched	TGFBI	42.1236	0.0147131	0.0237397	34520.3	507.9	819.5
Choroid Plexus-enriched	TRPV4	45.04	0.0117673	0.0222025	450.4	5.3	10
Choroid Plexus-enriched	TTC21A	0.593936	0.977802	1.0227	109.7	180.6	184.7
Choroid Plexus-enriched	TTR	2.20567	0.340836	0.453376	31.1	10.6	14.1
Choroid Plexus-enriched	TXNIP	13.6873	0.0730606	0.0453144	17292.5	1263.4	783.6
Choroid Plexus-enriched	VIL2	0.333881	0.457066	2.18787	2885.5	3950.1	8642.3
Choroid Plexus-enriched	WFDC2	0.588794	1.43852	0.695157	124	210.6	146.4
Near Ubiquitious	ACTB	0.96914	1.03184	0.722339	53971.3	55689.9	40227
Near Ubiquitious	AIRE	0.753281	0.524934	1.32753	28.7	20	38.1
Near Ubiquitious	ALAS1	4.79812	0.186424	0.208415	5452.1	1016.4	1136.3
Near Ubiquitious	APOE	3.76287	0.021203	0.265755	23713.6	502.8	6302
Near Ubiquitious	APP	0.473353	0.776706	1.28749	5836.2	9576.4	12329.5
Near Ubiquitious	ARHGDIB	154.859	0.0052458	0.00645749	27564.9	144.6	178
Near Ubiquitious	ARL6IP2	0.770367	1.29808	0.508401	2118.2	2749.6	1397.9
Near Ubiquitious	ATP5B	1.35285	0.73918	0.635868	13816.4	10212.8	8785.4
Near Ubiquitious	ATP6V0B	3.86445	0.258769	0.2269	13844	3582.4	3141.2
Near Ubiquitious	BRP44	1.87532	0.533243	0.507786	3833.9	2044.4	1946.8
Near Ubiquitious	CALCOCO1	0.658056	1.17103	0.853947	1044.4	1587.1	1355.3
Near Ubiquitious	CCNT2	0.453439	1.65403	0.604585	987	2176.7	1316
Near Ubiquitious	CENPF	0.18761	1.10953	0.901284	460.3	2453.5	2211.3
Near Ubiquitious	CHST12	1.05625	0.946747	0.797953	957.7	906.7	764.2
Near Ubiquitious	CLK1	0.371411	1.84163	0.542998	1560	4200.2	2280.7
Near Ubiquitious	COPZ2	3.67663	0.147643	0.271988	725.4	107.1	197.3
Near Ubiquitious	CTSD	28.7036	0.0220415	0.0348389	13846.6	305.2	482.4
Near Ubiquitious	DNAJC11	0.728098	1.14854	0.87067	874.3	1200.8	1045.5
Near Ubiquitious	DOK1	3.18831	0.171707	0.313646	1058.2	181.7	331.9
Near Ubiquitious	DRD5	0.625519	1.06402	0.939834	60.3	96.4	90.6
Near Ubiquitious	ELF5	0.289291	3.45673	0.0764951	20.8	71.9	5.5
Near Ubiquitious	ENO2	0.105687	1.36295	0.7337	347.7	3289.9	2413.8
Near Ubiquitious	FBXO22	1.10423	0.682565	0.905612	700.3	478	634.2
Near Ubiquitious	FUS	0.3283	1.22708	0.81494	2489.3	7582.4	6179.2
Near Ubiquitious	HABP4	0.248805	0.645769	1.54854	177	459.4	711.4
Near Ubiquitious	HES6	0.00430636	0.871219	1.14782	44.2	8942.1	10263.9
Near Ubiquitious	HKR2	0.708066	1.03281	0.968237	198.4	280.2	271.3
Near Ubiquitious	ICK	0.31238	1.76215	0.567487	178.9	572.7	325
Near Ubiquitious	IFNAR1	2.79116	0.221908	0.358275	1912.5	424.4	685.2
Near Ubiquitious	IGFBPL1	0.000577318	3.53794	0.282651	2.7	4676.8	1321.9
Near Ubiquitious	KCNN3	0.00930851	0.285962	3.49697	16.1	494.6	1729.6
Near Ubiquitious	KYNU	45.8119	0.0218284	0.0157908	4091	89.3	64.6
Near Ubiquitious	LAMP1	1.73457	0.202613	0.576511	23463.4	4754	13526.9
Near Ubiquitious	MAPRE3	0.205901	1.67039	0.598661	98.4	477.9	286.1
Near Ubiquitious	MLPH	1.53553	0.651242	0.439605	293.9	191.4	129.2
Near Ubiquitious	MUS81	0.555183	0.851642	1.1742	1075.5	1649.8	1937.2
Near Ubiquitious	NEU3	0.580071	1.30698	0.765125	48.9	84.3	64.5
Near Ubiquitious	OPRD1	0.486111	2.05714	0.444444	17.5	36	16
Near Ubiquitious	OPTC	0.321686	1.66895	0.599178	31.3	97.3	58.3
Near Ubiquitious	P4HB	2.10196	0.247529	0.475747	13355.2	3305.8	6353.7
Near Ubiquitious	PCYT2	0.706472	0.517799	1.41548	218.3	160	309
Near Ubiquitious	PEX16	1.45501	0.687279	0.60733	1413.4	971.4	858.4
Near Ubiquitious	PSAP	1.7032	0.257741	0.587129	38585.2	9945	22654.5
Near Ubiquitious	PTGFRN	0.349661	0.150149	2.85991	1476.9	634.2	4223.8
Near Ubiquitious	PTMA	0.693951	1.44102	0.584193	16943.1	24415.4	14263.3
Near Ubiquitious	RAB11B	0.523588	1.9099	0.518202	281.9	538.4	279
Near Ubiquitious	RNF122	0.644798	1.41891	0.704767	125.8	195.1	137.5
Near Ubiquitious	RSHL1	1.38856	0.595565	0.720169	94.7	56.4	68.2
Near Ubiquitious	SFRS11	1.22554	0.815965	0.721501	11749.4	9587.1	8477.2
Near Ubiquitious	SHANK2	0.0272773	14.7731	0.0676908	38	1393.1	94.3
Near Ubiquitious	SIX2	1.04938	0.952941	0.563025	119	113.4	67
Near Ubiquitious	SPAG9	0.427777	0.795986	1.2563	2293.7	4268	5361.9
Near Ubiquitious	SQSTM1	0.78215	0.247218	1.27853	4927	1557.3	6299.3
Near Ubiquitious	SRRM1	1.11292	0.898539	0.817884	4585	4119.8	3750
Near Ubiquitious	ST8SIA2	0.00694916	4.18814	0.23877	42	6043.9	1443.1
Near Ubiquitious	TITF1	0.183449	2.19018	0.456584	45	245.3	112
Near Ubiquitious	TNFAIP6	1.18093	0.846793	0.311164	84.2	71.3	26.2
Near Ubiquitious	TUBA1	0.395699	1.18644	0.842857	257.6	651	548.7
Near Ubiquitious	UBE2C	0.228607	1.24442	0.803588	521.2	2279.9	1832.1
Neuron-enriched	ADD2	0.0426965	3.74578	0.266967	84.3	1974.4	527.1
Neuron-enriched	ALCAM	1.96572	0.0828375	0.508718	1932.7	160.1	983.2
Neuron-enriched	ATP6V1G2	0.0377774	4.65245	0.214941	75.4	1995.9	429
Neuron-enriched	BEX2	0.0101005	2.4694	0.404956	37.7	3732.5	1511.5
Neuron-enriched	CALM2	1.21522	0.822893	0.680503	36832.6	30309.3	25064.7
Neuron-enriched	CAMK2A	0.114927	4.98026	0.200793	8.7	75.7	15.2
Neuron-enriched	CAMK2B	0.219552	4.55473	0.127902	323.4	1473	188.4
Neuron-enriched	CHGB	0.00971521	10.0855	0.0991523	10.2	1049.9	104.1
Neuron-enriched	CHN1	0.00359993	0.501579	1.9937	10.6	1476.9	2944.5
Neuron-enriched	CHST1	0.110613	0.600112	1.66636	79	428.6	714.2
Neuron-enriched	CLSTN3	0.0193379	2.29571	0.435595	11.8	610.2	265.8
Neuron-enriched	CPLX1	0.061236	16.3303	0.0539326	21.8	356	19.2
Neuron-enriched	CX3CL1	0.0400317	0.301142	3.32069	35.4	266.3	884.3
Neuron-enriched	CYFIP2	0.00727038	1.34922	0.741169	24.8	3411.1	2528.2
Neuron-enriched	DISP2	0.103334	3.19296	0.313189	77.8	752.9	235.8
Neuron-enriched	DPP6	0.0392762	3.26916	0.305889	67.5	1718.6	525.7
Neuron-enriched	EGR1	0.36324	0.933872	1.07081	9149.1	23521.9	25187.5
Neuron-enriched	FAIM2	0.0414031	1.56596	0.638585	14.4	347.8	222.1
Neuron-enriched	FBXW5	1.34016	0.693701	0.746179	1131.9	785.2	844.6
Neuron-enriched	FLYWCH1	1.25484	0.796912	0.733564	375.7	299.4	275.6
Neuron-enriched	GABARAPL1	0.697898	0.387642	1.43287	1660.3	922.2	2379
Neuron-enriched	GAP43	0.00675007	1.38645	0.721268	38.2	5659.2	4081.8
Neuron-enriched	GPR162	0.240668	0.55208	1.81133	67.7	155.3	281.3
Neuron-enriched	GRIA2	0.000790962	3.18099	0.314368	6	7585.7	2384.7
Neuron-enriched	GRIA3	0.00557648	2.14785	0.465581	15.1	2707.8	1260.7
Neuron-enriched	GRIA4	0.0807118	7.04027	0.14204	25.4	314.7	44.7
Neuron-enriched	GRIN2B	0.112563	1.70226	0.587456	60.3	535.7	314.7
Neuron-enriched	KIFC2	0.746877	1.06787	0.936448	412.5	552.3	517.2
Neuron-enriched	LBA1	1.73024	0.577956	0.464341	323.9	187.2	150.4
Neuron-enriched	LHX9	0.796296	1.25581	0.296296	43	54	16
Neuron-enriched	LRP11	0.168725	1.01986	0.980526	116.1	688.1	674.7
Neuron-enriched	MADD	0.583548	1.71365	0.543542	701.6	1202.3	653.5
Neuron-enriched	MAP2K1	1.7755	0.499654	0.563222	2743.5	1370.8	1545.2
Neuron-enriched	MAP2K4	0.798335	1.15117	0.868678	1381.2	1730.1	1502.9
Neuron-enriched	MYO5A	1.68272	0.594275	0.231273	5114.3	3039.3	1182.8
Neuron-enriched	NAPB	0.292626	2.32752	0.429641	363.5	1242.2	533.7
Neuron-enriched	NDFIP1	0.593745	0.755725	1.32323	6422	8174	10816.1
Neuron-enriched	NDRG4	0.0032644	0.502199	1.99124	17	2615.3	5207.7
Neuron-enriched	NEFL	0.0988232	8.18272	0.122209	65.5	662.8	81
Neuron-enriched	PACSIN1	0.527293	1.43349	0.697598	48.3	91.6	63.9
Neuron-enriched	PRKACA	3.11892	0.219605	0.320624	1571	345	503.7
Neuron-enriched	PRKAR1B	0.163012	1.8833	0.530982	85.5	524.5	278.5
Neuron-enriched	PTPRN	0.277139	3.60829	0.0555556	86.8	313.2	17.4
Neuron-enriched	REPS2	1.54439	0.647504	0.451336	396.6	256.8	179
Neuron-enriched	RTN1	0.04697	1.82139	0.549032	969.4	20638.7	11331.3
Neuron-enriched	RYR2	0.343478	2.91139	0.136232	71.1	207	28.2
Neuron-enriched	SH3GL2	0.00947522	3.81582	0.262067	11.7	1234.8	323.6
Neuron-enriched	SLC22A17	0.00715236	1.29332	0.773204	8.6	1202.4	929.7
Neuron-enriched	SMARCA2	1.2223	0.81813	0.696883	1751.8	1433.2	1220.8
Neuron-enriched	SNAP25	0.0101442	2.81653	0.355047	48.4	4771.2	1694
Neuron-enriched	SNRPN	0.71822	1.3298	0.751993	5458.9	7600.6	5715.6
Neuron-enriched	SYNGR3	0.0861141	1.71442	0.583288	64	743.2	433.5
Neuron-enriched	SYP	0.0577268	3.27732	0.305127	16.1	278.9	85.1
Neuron-enriched	SYT1	0.00459818	10.8831	0.0918853	17.6	3827.6	351.7
Neuron-enriched	TUBA4	0.81614	1.11415	0.897544	116.3	142.5	127.9
Neuron-enriched	UCHL1	0.00489713	1.56861	0.637506	69.1	14110.3	8995.4
Neuron-enriched	YWHAG	0.696429	1.4359	0.60223	13528.7	19425.8	11698.8
Oligodendrocyte-enriched	ABCA2	0.22121	1.00381	0.996206	116.6	527.1	525.1
Oligodendrocyte-enriched	ANLN	0.596239	0.704333	1.41978	656.4	775.4	1100.9
Oligodendrocyte-enriched	APOD	0.619192	1.61501	0.163636	61.3	99	16.2
Oligodendrocyte-enriched	ARHGEF10	0.247065	0.764497	1.30805	138.9	429.8	562.2
Oligodendrocyte-enriched	ARRDC3	0.303494	1.70383	0.586912	628.9	2072.2	1216.2
Oligodendrocyte-enriched	CD81	2.14298	0.215263	0.46664	26594.4	5724.8	12410
Oligodendrocyte-enriched	CLIC4	0.5445	0.77096	1.29708	3820.1	5408.9	7015.8
Oligodendrocyte-enriched	CNTN2	0.0262343	5.94691	0.168154	14.4	548.9	92.3
Oligodendrocyte-enriched	CRYAB	0.0229296	0.150762	6.63295	60	394.5	2616.7
Oligodendrocyte-enriched	CSRP1	0.686253	0.103716	1.45719	2720.1	411.1	3963.7
Oligodendrocyte-enriched	DAAM2	0.121578	0.196055	5.1006	41.3	66.6	339.7
Oligodendrocyte-enriched	EDG8	0.310734	1.05988	0.943503	5.5	17.7	16.7
Oligodendrocyte-enriched	EEF2	0.890932	1.12242	0.888194	22837.8	25633.6	22767.6
Oligodendrocyte-enriched	FA2H	0.521031	1.91927	0.484396	38.4	73.7	35.7
Oligodendrocyte-enriched	FABP5	0.401891	0.402351	2.48539	6735.5	6743.2	16759.5
Oligodendrocyte-enriched	FRMD4B	4.4922	0.222608	0.0575522	4118	916.7	237
Oligodendrocyte-enriched	GATM	1.59888	0.048052	0.625437	13021.3	625.7	8144
Oligodendrocyte-enriched	GJB1	1.59253	0.627932	0.0735608	93.8	58.9	6.9
Oligodendrocyte-enriched	GLTP	0.971699	0.448944	1.02913	2382.8	1100.9	2452.2
Oligodendrocyte-enriched	GPR37	1.28514	0.778127	0.744294	2352.7	1830.7	1751.1
Oligodendrocyte-enriched	GSN	4.37389	0.0388403	0.228629	10561.2	410.2	2414.6
Oligodendrocyte-enriched	HCN2	0.180362	2.7226	0.367297	43.9	243.4	89.4
Oligodendrocyte-enriched	HMGCS1	0.0840134	0.143864	6.95103	474.6	812.7	5649.1
Oligodendrocyte-enriched	LASS2	2.09513	0.217154	0.477297	5334	1158.3	2545.9
Oligodendrocyte-enriched	MAG	0.965606	1.03562	0.417885	112.3	116.3	48.6
Oligodendrocyte-enriched	MAL	0.728543	0.47505	1.3726	36.5	23.8	50.1
Oligodendrocyte-enriched	MAP2K6	0.366331	1.50518	0.664373	138.4	377.8	251
Oligodendrocyte-enriched	MBP	15.0111	0.0378668	0.0666175	2709.5	102.6	180.5
Oligodendrocyte-enriched	MCAM	0.740484	0.475894	1.35047	963	618.9	1300.5
Oligodendrocyte-enriched	MOBP	0.951087	1.05143	0.623188	52.5	55.2	34.4
Oligodendrocyte-enriched	MOG	0.10925	1.79948	0.555717	15	137.3	76.3
Oligodendrocyte-enriched	MTRR	1.12197	0.865534	0.891289	1106.6	957.8	986.3
Oligodendrocyte-enriched	NDRG1	0.319711	3.12783	0.111358	676.7	2116.6	235.7
Oligodendrocyte-enriched	NPC1	4.46302	0.0979356	0.224064	4199.7	411.3	941
Oligodendrocyte-enriched	NRBP2	0.18485	0.503011	1.98803	457.3	1244.4	2473.9
Oligodendrocyte-enriched	OLIG1	0.00221143	0.958243	1.04358	5.1	2209.9	2306.2
Oligodendrocyte-enriched	OLIG2	0.00738294	0.812221	1.23119	7.6	836.1	1029.4
Oligodendrocyte-enriched	OMG	0.636013	1.5723	0.52283	98.9	155.5	81.3
Oligodendrocyte-enriched	PACS2	0.937659	1.06649	0.676872	1436.4	1531.9	1036.9
Oligodendrocyte-enriched	PCYT2	0.706472	0.517799	1.41548	218.3	160	309
Oligodendrocyte-enriched	PLEKHB1	0.106195	0.107376	9.31307	152.9	154.6	1439.8
Oligodendrocyte-enriched	PLEKHG3	0.763786	0.83245	1.20127	288.1	314	377.2
Oligodendrocyte-enriched	PTGDS	0.55601	0.496853	1.79853	176.7	157.9	317.8
Oligodendrocyte-enriched	QDPR	1.7101	0.391026	0.58476	3456.8	1351.7	2021.4
Oligodendrocyte-enriched	RNF13	5.01547	0.135642	0.199383	14424	1956.5	2875.9
Oligodendrocyte-enriched	S100A16	0.0412805	0.126306	7.9173	189.3	579.2	4585.7
Oligodendrocyte-enriched	SEPP1	11.3604	0.0158501	0.0880254	38371.9	608.2	3377.7
Oligodendrocyte-enriched	SEPT4	0.0686715	0.809246	1.23572	15.3	180.3	222.8
Oligodendrocyte-enriched	SERINC5	0.480038	2.07905	0.480989	50.5	105.2	50.6
Oligodendrocyte-enriched	SGK	7.7608	0.0754243	0.128853	13575.2	1023.9	1749.2
Oligodendrocyte-enriched	SOX10	0.542825	1.84221	0.535595	97.6	179.8	96.3
Oligodendrocyte-enriched	SYT11	0.0257048	0.643748	1.5534	334.9	8387.2	13028.7
Oligodendrocyte-enriched	TALDO1	1.43669	0.696045	0.624601	12096.2	8419.5	7555.3
Oligodendrocyte-enriched	TEGT	1.6599	0.370712	0.602446	19000.2	7043.6	11446.6
Oligodendrocyte-enriched	TMEM10	1.23843	0.798131	0.807477	53.5	42.7	43.2
Oligodendrocyte-enriched	TMEM63A	1.84384	0.294546	0.542347	397.9	117.2	215.8
Oligodendrocyte-enriched	TSPAN2	0.110972	1.18583	0.843289	44.4	400.1	337.4
Oligodendrocyte-enriched	TTYH2	1.05357	0.46848	0.949154	1205.6	564.8	1144.3
Oligodendrocyte-enriched	UGT8	0.248295	1.55516	0.64302	54.6	219.9	141.4
