# Supplementary material for: Evolution of the Aging Brain Transcriptome and Synaptic Regulation
Source: PLoS One. 2008 Oct 2;3(10):e3329. doi: 10.1371/journal.pone.0003329 (PMC2553198; doi:10.1371/journal.pone.0003329)
Supplement: Table S8 — Age-Related Expression Changes of Genes Enriched in Specific Cortical Cell Types In Vivo (0.12 MB XLS) [file pone.0003329.s012.xls]

## Sheet: human
Cell Type Enrichment	Gene	q-value (%)	fold
Astrocyte-enriched	ALDOC
Astrocyte-enriched	APOE				OBSERVED	chi-squared = 114.7936, df = NA, p-value = 0.000999 (simulated p-value based on 1000 replicates)
Astrocyte-enriched	AQP4	0.964805	1.51842				up	down	no change	total	up (%)	down (%)	no change (%)
Astrocyte-enriched	ATP1A2	0.549096	1.75901			Astrocyte-enriched	9	1	17	27	0.333333	0.037037	0.62963
Astrocyte-enriched	BCAN					Choroid Plexus-enriched	7	3	43	53	0.132075	0.0566038	0.811321
Astrocyte-enriched	CLDN5					Near Ubiquitious	5	12	32	49	0.102041	0.244898	0.653061
Astrocyte-enriched	CLU	0.194919	1.19986			Neuron-enriched	0	44	16	60	0	0.733333	0.266667
Astrocyte-enriched	CSPG3					Oligodendrocyte-enriched	12	2	43	57	0.210526	0.0350877	0.754386
Astrocyte-enriched	CST3					Total	33	62	151	246	0.134146	0.252033	0.613821
Astrocyte-enriched	DBI
Astrocyte-enriched	EDG1
Astrocyte-enriched	EMX2	0.194919	1.70676		EXPECTED
Astrocyte-enriched	FLJ25530	0.139528	1.54461				up	down	no change	total	up (%)	down (%)	no change (%)
Astrocyte-enriched	GFAP	0.278664	1.97389			Astrocyte-enriched	3.62195	6.80488	16.5732	27	0.134146	0.252033	0.613821
Astrocyte-enriched	GJA1	0.740356	1.62049			Choroid Plexus-enriched	7.10976	13.3577	32.5325	53	0.134146	0.252033	0.613821
Astrocyte-enriched	GLDC					Near Ubiquitious	6.57317	12.3496	30.0772	49	0.134146	0.252033	0.613821
Astrocyte-enriched	GLUL					Neuron-enriched	8.04878	15.122	36.8293	60	0.134146	0.252033	0.613821
Astrocyte-enriched	GSN					Oligodendrocyte-enriched	7.64634	14.3659	34.9878	57	0.134146	0.252033	0.613821
Astrocyte-enriched	ITGAM						33	62	151	246	0.134146	0.252033	0.613821
Astrocyte-enriched	ITGB5
Astrocyte-enriched	MAGI1	0.0203962	-1.67468		(OBSERVED/EXPECTED)
Astrocyte-enriched	PLA2G7						up	down	not
Astrocyte-enriched	PPAP2B	0.139528	1.69719			Astrocyte-enriched	2.48485	0.146953	1.02575
Astrocyte-enriched	PRDX6	0.740356	1.4186			Choroid Plexus-enriched	0.984563	0.224589	1.32175
Astrocyte-enriched	SELPLG					Near Ubiquitious	0.760668	0.971692	1.06393
Astrocyte-enriched	SPARC					Neuron-enriched	0	2.90968	0.434437
Astrocyte-enriched	SPARCL1					Oligodendrocyte-enriched	1.56938	0.139219	1.229
Choroid Plexus-enriched	ACAD8	0.0348594	-1.22575
Choroid Plexus-enriched	ALS2CR4	0.194919	-1.22136
Choroid Plexus-enriched	ATP6V0E
Choroid Plexus-enriched	C21orf62
Choroid Plexus-enriched	C6orf206
Choroid Plexus-enriched	CAB39L
Choroid Plexus-enriched	CALML4
Choroid Plexus-enriched	CCND3
Choroid Plexus-enriched	CFH
Choroid Plexus-enriched	CLDN1
Choroid Plexus-enriched	COL8A1
Choroid Plexus-enriched	COL8A2
Choroid Plexus-enriched	CSRP2
Choroid Plexus-enriched	CTSC
Choroid Plexus-enriched	ECRG4
Choroid Plexus-enriched	ELOVL7
Choroid Plexus-enriched	EPHX1	0.0646032	1.81562
Choroid Plexus-enriched	F13A1
Choroid Plexus-enriched	FADS1
Choroid Plexus-enriched	FLJ21986
Choroid Plexus-enriched	FOLR1
Choroid Plexus-enriched	FXYD1	0.740356	1.60817
Choroid Plexus-enriched	GGH	0.0203962	-1.3706
Choroid Plexus-enriched	ITGB5
Choroid Plexus-enriched	KDR
Choroid Plexus-enriched	KIF9
Choroid Plexus-enriched	KL
Choroid Plexus-enriched	LEPR
Choroid Plexus-enriched	LGALS3BP
Choroid Plexus-enriched	LOC441762
Choroid Plexus-enriched	LUM
Choroid Plexus-enriched	MSX1
Choroid Plexus-enriched	MXRA8
Choroid Plexus-enriched	MYO7A
Choroid Plexus-enriched	NID2
Choroid Plexus-enriched	NOTCH2	0.0348594	1.67304
Choroid Plexus-enriched	NXN
Choroid Plexus-enriched	PBXIP1	0.0900293	1.75514
Choroid Plexus-enriched	PCOLCE2
Choroid Plexus-enriched	PERP
Choroid Plexus-enriched	PGCP	0.740356	1.43017
Choroid Plexus-enriched	PLTP	0.549096	1.46977
Choroid Plexus-enriched	PRLR
Choroid Plexus-enriched	RBP1
Choroid Plexus-enriched	RNASET2
Choroid Plexus-enriched	SLC26A11
Choroid Plexus-enriched	SLCO1C1
Choroid Plexus-enriched	SPINT2
Choroid Plexus-enriched	SULF1
Choroid Plexus-enriched	SYNE2
Choroid Plexus-enriched	TXNIP	0.549096	3.29594
Choroid Plexus-enriched	VIL2
Choroid Plexus-enriched	WFDC2
Near Ubiquitious	ACTB
Near Ubiquitious	ALAS1	0.0348594	-1.40501
Near Ubiquitious	APOE
Near Ubiquitious	APP
Near Ubiquitious	ATP5B	0.0203962	-1.50571
Near Ubiquitious	ATP6V0B	0.0203962	-1.44459
Near Ubiquitious	BRP44	0.0203962	-1.58793
Near Ubiquitious	C15orf17	0.278664	-1.29137
Near Ubiquitious	C1orf91
Near Ubiquitious	C3orf37	0.0900293	-1.27645
Near Ubiquitious	C6orf111
Near Ubiquitious	CALCOCO1
Near Ubiquitious	CCNT2
Near Ubiquitious	CENPF
Near Ubiquitious	CHST12
Near Ubiquitious	CTSD
Near Ubiquitious	DNAJC11
Near Ubiquitious	ENO2
Near Ubiquitious	FBXO22
Near Ubiquitious	FLJ21106
Near Ubiquitious	FUS	0.0203962	-1.74274
Near Ubiquitious	HABP4	0.740356	-1.17766
Near Ubiquitious	HKR2
Near Ubiquitious	ICK
Near Ubiquitious	IFNAR1
Near Ubiquitious	JUND
Near Ubiquitious	KIAA1414
Near Ubiquitious	LAMP1	0.0900293	1.32764
Near Ubiquitious	LOC440085	0.740356	1.19818
Near Ubiquitious	LOC441454	0.390124	1.3105
Near Ubiquitious	LOC441456	0.390124	1.3105
Near Ubiquitious	MAPRE3	0.0203962	-1.4865
Near Ubiquitious	MUS81
Near Ubiquitious	NEU3
Near Ubiquitious	P4HB
Near Ubiquitious	PCYT2
Near Ubiquitious	PEX16
Near Ubiquitious	PSAP
Near Ubiquitious	PTGFRN	0.0203962	-1.45607
Near Ubiquitious	PTMA	0.390124	1.3105
Near Ubiquitious	RAB11B
Near Ubiquitious	SFRS11
Near Ubiquitious	SIX2
Near Ubiquitious	SPAG9	0.549096	-1.18025
Near Ubiquitious	SQSTM1
Near Ubiquitious	SRRM1
Near Ubiquitious	TNFAIP6
Near Ubiquitious	TUBA3	0.0203962	-1.27123
Near Ubiquitious	UBE2C
Neuron-enriched	ADD2	0.0203962	-1.44061
Neuron-enriched	ALCAM
Neuron-enriched	ATP6V1G2	0.0203962	-1.55921
Neuron-enriched	BEX2	0.0348594	-1.27905
Neuron-enriched	C16orf45
Neuron-enriched	CALM2	0.0348594	-1.15469
Neuron-enriched	CAMK2A
Neuron-enriched	CAMK2B	0.139528	-1.28487
Neuron-enriched	CHGB	0.0203962	-1.8664
Neuron-enriched	CHST1	0.0203962	-1.29124
Neuron-enriched	CLSTN3	0.0203962	-1.78565
Neuron-enriched	CPLX1
Neuron-enriched	CX3CL1	0.0203962	-1.5627
Neuron-enriched	CYFIP2	0.390124	-1.20265
Neuron-enriched	DPP6	0.0203962	-1.61705
Neuron-enriched	EGR1	0.0203962	-1.87357
Neuron-enriched	FAIM2	0.278664	-1.30986
Neuron-enriched	FAM49A	0.0203962	-1.95488
Neuron-enriched	FBXW5	0.0203962	-1.23156
Neuron-enriched	FLYWCH1
Neuron-enriched	GABARAPL1	0.0203962	-2.23869
Neuron-enriched	GAP43	0.0203962	-1.73925
Neuron-enriched	GRIA2	0.139528	-1.29592
Neuron-enriched	GRIA3
Neuron-enriched	GRIA4	0.0203962	-1.74721
Neuron-enriched	GRIN2B
Neuron-enriched	HMP19	0.0203962	-1.59038
Neuron-enriched	KIAA0738	0.0203962	-1.26587
Neuron-enriched	KIAA1045	0.0203962	-1.52469
Neuron-enriched	KIFC2
Neuron-enriched	LKAP
Neuron-enriched	LRP11	0.0203962	-1.388
Neuron-enriched	MADD	0.0203962	-1.29099
Neuron-enriched	MAP2K1
Neuron-enriched	MAP2K4	0.0203962	-1.83847
Neuron-enriched	MARLIN1	0.0646032	-1.36117
Neuron-enriched	MYO5A	0.0203962	-1.76616
Neuron-enriched	NAPB
Neuron-enriched	NDRG4	0.549096	-1.21167
Neuron-enriched	NEFL	0.0203962	-1.78399
Neuron-enriched	PACSIN1	0.0203962	-1.43478
Neuron-enriched	PRKACA
Neuron-enriched	PRKAR1B	0.390124	-1.35133
Neuron-enriched	PTPRN	0.0348594	-1.33126
Neuron-enriched	RAB6A	0.0203962	-2.1964
Neuron-enriched	RAB6C	0.0203962	-1.27948
Neuron-enriched	REPS2	0.0203962	-1.52686
Neuron-enriched	RTN1	0.0203962	-1.34902
Neuron-enriched	RYR2	0.549096	-1.33735
Neuron-enriched	SH3GL2
Neuron-enriched	SLC22A17
Neuron-enriched	SMARCA2	0.0203962	-1.70748
Neuron-enriched	SNAP25	0.0203962	-1.85811
Neuron-enriched	SNRPN	0.0203962	-1.73753
Neuron-enriched	SYNGR3	0.0203962	-1.66102
Neuron-enriched	SYP
Neuron-enriched	SYT1
Neuron-enriched	TUBA1	0.0203962	-1.48602
Neuron-enriched	UCHL1	0.0348594	-1.30181
Neuron-enriched	YWHAG	0.0646032	-1.22502
Oligodendrocyte-enriched	ABCA2
Oligodendrocyte-enriched	ACTC
Oligodendrocyte-enriched	ANLN
Oligodendrocyte-enriched	APOD	0.0348594	2.25075
Oligodendrocyte-enriched	ARHGEF10
Oligodendrocyte-enriched	C11orf9
Oligodendrocyte-enriched	CA2
Oligodendrocyte-enriched	CD81	0.0900293	1.29639
Oligodendrocyte-enriched	CLIC4
Oligodendrocyte-enriched	CNP	0.964805	2.01959
Oligodendrocyte-enriched	CNTN2
Oligodendrocyte-enriched	CP110
Oligodendrocyte-enriched	CRYAB	0.139528	2.22455
Oligodendrocyte-enriched	CSRP1	0.0348594	1.65943
Oligodendrocyte-enriched	DAAM2
Oligodendrocyte-enriched	EEF2
Oligodendrocyte-enriched	FA2H	0.549096	2.03857
Oligodendrocyte-enriched	FABP5
Oligodendrocyte-enriched	FRMD4B
Oligodendrocyte-enriched	GATM
Oligodendrocyte-enriched	GLTP
Oligodendrocyte-enriched	GSN
Oligodendrocyte-enriched	HCN2
Oligodendrocyte-enriched	HMGCS1	0.0203962	-1.83063
Oligodendrocyte-enriched	HSUP1
Oligodendrocyte-enriched	KIAA1189
Oligodendrocyte-enriched	MAG
Oligodendrocyte-enriched	MAL
Oligodendrocyte-enriched	MAP2K6
Oligodendrocyte-enriched	MBP	0.964805	1.84465
Oligodendrocyte-enriched	MCAM
Oligodendrocyte-enriched	MOBP
Oligodendrocyte-enriched	MOG
Oligodendrocyte-enriched	MTRR
Oligodendrocyte-enriched	NDRG1	0.0646032	1.62802
Oligodendrocyte-enriched	NPC1
Oligodendrocyte-enriched	NRBP2
Oligodendrocyte-enriched	OLIG1
Oligodendrocyte-enriched	OLIG2
Oligodendrocyte-enriched	OMG
Oligodendrocyte-enriched	PACS2
Oligodendrocyte-enriched	PCYT2
Oligodendrocyte-enriched	PEX5L
Oligodendrocyte-enriched	PLEKHB1	0.0646032	2.12097
Oligodendrocyte-enriched	PTGDS
Oligodendrocyte-enriched	QDPR
Oligodendrocyte-enriched	QKI	0.278664	1.49384
Oligodendrocyte-enriched	S100A16
Oligodendrocyte-enriched	SEPP1	0.390124	1.77833
Oligodendrocyte-enriched	SGK	0.0348594	2.15309
Oligodendrocyte-enriched	SOX10
Oligodendrocyte-enriched	SYT11	0.964805	-1.25843
Oligodendrocyte-enriched	TALDO1
Oligodendrocyte-enriched	TEGT
Oligodendrocyte-enriched	TMEM10
Oligodendrocyte-enriched	TSPAN2
Oligodendrocyte-enriched	TTYH2

## Sheet: mouse
Table S8: Age-Related Expression Changes of Genes Enriched in Specific Cortical Cell Types In Vivo
This table lists the significant age-related expression changes in humans and mice for genes enriched in specific neural cell types as determined by the Allen Brain Atlas. All genes resolved by the Allen Brain Atlas and represented on either the Affymetrix Mouse Genome 430 2.0 or the Human U133plus microarrays are listed. If a gene also shows a significant age-related expression change, the q-val…
Specific column descriptions are provided
column name	description
species	species in which the expression changes were observed
cell-type	cell-type in which a gene is enriched in mouse, as determined by in-situ hybridization performed at the Allen Brain Institute
Gene	official gene symbol
q-value(%)	the q-value (calculated by Significance Analysis of Microarray (SAM) software), reported as a percentage
fold	age-related fold change (red = up-regulated with age, blue = down-regulated with age)
species	cell-type	Gene	q-value (%)	fold change
Mouse	Astrocyte-enriched	2900042E01Rik	0.0166059	1.45772
Mouse	Astrocyte-enriched	Aldoc	0.0166059	1.51889
Mouse	Astrocyte-enriched	Apoe
Mouse	Astrocyte-enriched	Aqp4	0.0166059	1.65116
Mouse	Astrocyte-enriched	Atp1a2	0.0166059	1.27767
Mouse	Astrocyte-enriched	Bcan
Mouse	Astrocyte-enriched	C030039L03Rik	0.192757	1.42216
Mouse	Astrocyte-enriched	C1qa	0.0166059	2.49927
Mouse	Astrocyte-enriched	Cldn5
Mouse	Astrocyte-enriched	Clu	0.0166059	1.21286
Mouse	Astrocyte-enriched	Cspg3	0.240375	1.26732
Mouse	Astrocyte-enriched	Cst3
Mouse	Astrocyte-enriched	Dbi	0.348192	1.17403
Mouse	Astrocyte-enriched	Edg1
Mouse	Astrocyte-enriched	Emx2
Mouse	Astrocyte-enriched	Gfap	0.0166059	4.12178
Mouse	Astrocyte-enriched	Gja1	0.0166059	1.33721
Mouse	Astrocyte-enriched	Gldc	0.288097	1.16117
Mouse	Astrocyte-enriched	Glul	0.0845758	1.28786
Mouse	Astrocyte-enriched	Gpr37l1	0.0845758	1.24655
Mouse	Astrocyte-enriched	Gsn	0.0166059	1.65383
Mouse	Astrocyte-enriched	Id3
Mouse	Astrocyte-enriched	Itgam	0.0166059	1.47707
Mouse	Astrocyte-enriched	Itgb5	0.0166059	2.32653
Mouse	Astrocyte-enriched	Lyzs
Mouse	Astrocyte-enriched	Magi1	0.500155	1.16724
Mouse	Astrocyte-enriched	Matn4	0.0567437	1.39205
Mouse	Astrocyte-enriched	Mfge8	0.0166059	1.42032
Mouse	Astrocyte-enriched	Mlph
Mouse	Astrocyte-enriched	Mt1
Mouse	Astrocyte-enriched	Pla2g7	0.0567437	1.43015
Mouse	Astrocyte-enriched	Ppap2b	0.0166059	1.15216
Mouse	Astrocyte-enriched	Prdx6
Mouse	Astrocyte-enriched	Selpl	0.500155	1.14623
Mouse	Astrocyte-enriched	Slc6a20
Mouse	Astrocyte-enriched	Sox8	0.192757	1.51215
Mouse	Astrocyte-enriched	Sparc
Mouse	Astrocyte-enriched	Sparcl1
Mouse	Astrocyte-enriched	Stab1	0.348192	-1.19779
Mouse	Choroid Plexus-enriched	1110059M19Rik	0.948696	-1.61028
Mouse	Choroid Plexus-enriched	1500015O10Rik	0.119564	-1.22433
Mouse	Choroid Plexus-enriched	1700027N10Rik
Mouse	Choroid Plexus-enriched	4932438H23Rik
Mouse	Choroid Plexus-enriched	4933405A16Rik
Mouse	Choroid Plexus-enriched	A430107O13Rik
Mouse	Choroid Plexus-enriched	Abca4
Mouse	Choroid Plexus-enriched	Acaa2	0.146087	1.37764
Mouse	Choroid Plexus-enriched	Acacb
Mouse	Choroid Plexus-enriched	Acad8	0.0984834	1.31319
Mouse	Choroid Plexus-enriched	Ace
Mouse	Choroid Plexus-enriched	Adh1
Mouse	Choroid Plexus-enriched	Als2cr4
Mouse	Choroid Plexus-enriched	Atp6v0e
Mouse	Choroid Plexus-enriched	BC013481	0.411953	-1.62959
Mouse	Choroid Plexus-enriched	BC013491
Mouse	Choroid Plexus-enriched	C230095G01Rik
Mouse	Choroid Plexus-enriched	C330016K18Rik
Mouse	Choroid Plexus-enriched	Cab39l	0.0166059	1.26528
Mouse	Choroid Plexus-enriched	Calml4
Mouse	Choroid Plexus-enriched	Ccnd3	0.146087	-1.68947
Mouse	Choroid Plexus-enriched	Cdh3
Mouse	Choroid Plexus-enriched	Cfh	0.0845758	1.38713
Mouse	Choroid Plexus-enriched	Cldn1
Mouse	Choroid Plexus-enriched	Cldn2
Mouse	Choroid Plexus-enriched	Col8a1	0.776349	-1.6229
Mouse	Choroid Plexus-enriched	Col8a2
Mouse	Choroid Plexus-enriched	Col9a3
Mouse	Choroid Plexus-enriched	Csrp2
Mouse	Choroid Plexus-enriched	Ctsc
Mouse	Choroid Plexus-enriched	Dnali1
Mouse	Choroid Plexus-enriched	Dusp22	0.0166059	1.40808
Mouse	Choroid Plexus-enriched	E030013G06Rik
Mouse	Choroid Plexus-enriched	Efs	0.0166059	1.55008
Mouse	Choroid Plexus-enriched	Elovl7
Mouse	Choroid Plexus-enriched	Ephx1	0.0166059	1.5921
Mouse	Choroid Plexus-enriched	F13a1	0.240375	1.55304
Mouse	Choroid Plexus-enriched	F5
Mouse	Choroid Plexus-enriched	Fads1	0.500155	1.16812
Mouse	Choroid Plexus-enriched	Fhad1
Mouse	Choroid Plexus-enriched	Folr1
Mouse	Choroid Plexus-enriched	Fxyd1
Mouse	Choroid Plexus-enriched	Fzd4	0.948696	-1.94167
Mouse	Choroid Plexus-enriched	Gc
Mouse	Choroid Plexus-enriched	Hemk1	0.0283489	1.19789
Mouse	Choroid Plexus-enriched	Itgb5	0.0166059	2.32653
Mouse	Choroid Plexus-enriched	Kcne2
Mouse	Choroid Plexus-enriched	Kdr
Mouse	Choroid Plexus-enriched	Kif9	0.288097	-1.17898
Mouse	Choroid Plexus-enriched	Kl
Mouse	Choroid Plexus-enriched	Lbp
Mouse	Choroid Plexus-enriched	Lepr
Mouse	Choroid Plexus-enriched	Lgals3bp
Mouse	Choroid Plexus-enriched	Lrp10	0.0166059	1.38154
Mouse	Choroid Plexus-enriched	Lum
Mouse	Choroid Plexus-enriched	Msx1
Mouse	Choroid Plexus-enriched	Mxra8
Mouse	Choroid Plexus-enriched	Myo7a
Mouse	Choroid Plexus-enriched	Nek11
Mouse	Choroid Plexus-enriched	Nid2
Mouse	Choroid Plexus-enriched	Notch2	0.0166059	1.42794
Mouse	Choroid Plexus-enriched	Nxn
Mouse	Choroid Plexus-enriched	Otx2
Mouse	Choroid Plexus-enriched	Pbxip1	0.0166059	1.36438
Mouse	Choroid Plexus-enriched	Pcolce	0.192757	1.24845
Mouse	Choroid Plexus-enriched	Pcolce2
Mouse	Choroid Plexus-enriched	Perp
Mouse	Choroid Plexus-enriched	Pgcp	0.948696	1.23231
Mouse	Choroid Plexus-enriched	Pgpep1	0.948696	-1.4362
Mouse	Choroid Plexus-enriched	Pltp	0.348192	1.46026
Mouse	Choroid Plexus-enriched	Prlr
Mouse	Choroid Plexus-enriched	Rbp1
Mouse	Choroid Plexus-enriched	Rnaset2	0.0166059	1.25201
Mouse	Choroid Plexus-enriched	Slc26a11
Mouse	Choroid Plexus-enriched	Slc39a12	0.948696	1.16244
Mouse	Choroid Plexus-enriched	Slco1c1
Mouse	Choroid Plexus-enriched	Sostdc1
Mouse	Choroid Plexus-enriched	Spint2	0.0984834	1.58217
Mouse	Choroid Plexus-enriched	St6galnac2
Mouse	Choroid Plexus-enriched	Steap2	0.776349	1.23039
Mouse	Choroid Plexus-enriched	Stra6
Mouse	Choroid Plexus-enriched	Sulf1	0.0166059	1.73776
Mouse	Choroid Plexus-enriched	Syne2
Mouse	Choroid Plexus-enriched	Tcn2	0.0166059	1.76406
Mouse	Choroid Plexus-enriched	Tgfbi
Mouse	Choroid Plexus-enriched	Tmprss11a
Mouse	Choroid Plexus-enriched	Trpv4
Mouse	Choroid Plexus-enriched	ttc21a
Mouse	Choroid Plexus-enriched	Ttr
Mouse	Choroid Plexus-enriched	Txnip	0.348192	1.17782
Mouse	Choroid Plexus-enriched	Vil2	0.0166059	1.23147
Mouse	Choroid Plexus-enriched	Wfdc2
Mouse	Choroid Plexus-enriched	Xtrp3s1
Mouse	Near Ubiquitious	1110003F05Rik
Mouse	Near Ubiquitious	1700008H02Rik
Mouse	Near Ubiquitious	2310014H01Rik	0.0567437	1.25192
Mouse	Near Ubiquitious	2310046O06Rik
Mouse	Near Ubiquitious	2510006D16Rik
Mouse	Near Ubiquitious	2610002F03Rik
Mouse	Near Ubiquitious	2610028H24Rik
Mouse	Near Ubiquitious	3000002C10Rik
Mouse	Near Ubiquitious	3110057O12Rik	0.639002	-1.25196
Mouse	Near Ubiquitious	4832428D23Rik
Mouse	Near Ubiquitious	4930470H14Rik
Mouse	Near Ubiquitious	4930539E08Rik	0.0166059	1.26197
Mouse	Near Ubiquitious	5730406M06Rik	0.0166059	-1.4865
Mouse	Near Ubiquitious	5730422E09Rik
Mouse	Near Ubiquitious	5830411J07Rik
Mouse	Near Ubiquitious	5830477G23Rik
Mouse	Near Ubiquitious	8030498B09Rik
Mouse	Near Ubiquitious	8430410A17Rik
Mouse	Near Ubiquitious	9330133O14Rik
Mouse	Near Ubiquitious	A130050O07Rik
Mouse	Near Ubiquitious	A230048G03Rik
Mouse	Near Ubiquitious	A230106M20Rik	0.948696	1.21716
Mouse	Near Ubiquitious	Actb	0.0283489	3.83551
Mouse	Near Ubiquitious	Aire
Mouse	Near Ubiquitious	Alas1	0.0166059	1.20603
Mouse	Near Ubiquitious	Apoe
Mouse	Near Ubiquitious	App	0.288097	-1.16274
Mouse	Near Ubiquitious	Arhgdib
Mouse	Near Ubiquitious	Arl6ip2	0.0845758	1.14677
Mouse	Near Ubiquitious	Atp5b	0.0283489	-1.10325
Mouse	Near Ubiquitious	Atp6v0b	0.0166059	1.26591
Mouse	Near Ubiquitious	BC026590
Mouse	Near Ubiquitious	BC027057
Mouse	Near Ubiquitious	Brp44
Mouse	Near Ubiquitious	C030039L03Rik	0.192757	1.42216
Mouse	Near Ubiquitious	Calcoco1	0.776349	1.16128
Mouse	Near Ubiquitious	Ccnt2	0.0567437	1.28572
Mouse	Near Ubiquitious	Cenpf
Mouse	Near Ubiquitious	Chst12
Mouse	Near Ubiquitious	Clk1
Mouse	Near Ubiquitious	Copz2
Mouse	Near Ubiquitious	Ctsd	0.0166059	1.53497
Mouse	Near Ubiquitious	Dnajc11	0.0166059	1.22663
Mouse	Near Ubiquitious	Dok1
Mouse	Near Ubiquitious	E030030I06Rik
Mouse	Near Ubiquitious	E130309B19Rik
Mouse	Near Ubiquitious	Elf5
Mouse	Near Ubiquitious	Eno2
Mouse	Near Ubiquitious	Fbxo22	0.776349	1.1294
Mouse	Near Ubiquitious	Fus	0.411953	1.14456
Mouse	Near Ubiquitious	Hes6
Mouse	Near Ubiquitious	Hkr2
Mouse	Near Ubiquitious	Ick
Mouse	Near Ubiquitious	Ifnar1	0.0166059	1.23009
Mouse	Near Ubiquitious	Igfbpl1
Mouse	Near Ubiquitious	Jund1
Mouse	Near Ubiquitious	Kcnn3
Mouse	Near Ubiquitious	Kynu
Mouse	Near Ubiquitious	Lamp1	0.0283489	1.13946
Mouse	Near Ubiquitious	LOC545253
Mouse	Near Ubiquitious	Mapre3
Mouse	Near Ubiquitious	Mlph
Mouse	Near Ubiquitious	Mus81	0.0166059	1.3924
Mouse	Near Ubiquitious	Neu3
Mouse	Near Ubiquitious	Oprd1
Mouse	Near Ubiquitious	Optc
Mouse	Near Ubiquitious	P4hb	0.288097	1.14428
Mouse	Near Ubiquitious	Pcyt2	0.0166059	1.33013
Mouse	Near Ubiquitious	Pex16	0.0567437	1.42463
Mouse	Near Ubiquitious	Psap
Mouse	Near Ubiquitious	Ptgfrn
Mouse	Near Ubiquitious	Ptma
Mouse	Near Ubiquitious	Rab11b
Mouse	Near Ubiquitious	Rdh1
Mouse	Near Ubiquitious	Rnf122
Mouse	Near Ubiquitious	Rshl1
Mouse	Near Ubiquitious	Sfrs11	0.0984834	-1.14313
Mouse	Near Ubiquitious	Six2
Mouse	Near Ubiquitious	Spag9
Mouse	Near Ubiquitious	Sqstm1
Mouse	Near Ubiquitious	Srrm1	0.0567437	1.16745
Mouse	Near Ubiquitious	St8sia2
Mouse	Near Ubiquitious	Titf1
Mouse	Near Ubiquitious	Tnfaip6
Mouse	Near Ubiquitious	Tuba1	0.192757	1.16384
Mouse	Near Ubiquitious	Ube2c
Mouse	Near Ubiquitious	Zfp324	0.192757	1.30216
Mouse	Near Ubiquitious	Zfp353
Mouse	Neuron-enriched	2900011O08Rik	0.0567437	1.14961
Mouse	Neuron-enriched	2900097C17Rik
Mouse	Neuron-enriched	3321401G04Rik	0.500155	-1.22879
Mouse	Neuron-enriched	Add2
Mouse	Neuron-enriched	Alcam	0.0166059	1.22676
Mouse	Neuron-enriched	Atp6v1g2
Mouse	Neuron-enriched	Bex2	0.500155	-1.15397
Mouse	Neuron-enriched	Calm2
Mouse	Neuron-enriched	Camk2a	0.0166059	1.77762
Mouse	Neuron-enriched	Camk2b	0.288097	1.47586
Mouse	Neuron-enriched	Chgb
Mouse	Neuron-enriched	Chn1	0.411953	1.28404
Mouse	Neuron-enriched	Chst1	0.146087	1.14848
Mouse	Neuron-enriched	Clstn3	0.192757	1.28646
Mouse	Neuron-enriched	Cplx1	0.948696	1.06943
Mouse	Neuron-enriched	Cx3cl1	0.500155	-1.08752
Mouse	Neuron-enriched	Cyfip2	0.639002	1.05908
Mouse	Neuron-enriched	D12Ertd553e	0.411953	1.15156
Mouse	Neuron-enriched	Disp2
Mouse	Neuron-enriched	Dpp6	0.776349	1.14074
Mouse	Neuron-enriched	E130013N09Rik
Mouse	Neuron-enriched	Egr1	0.776349	-1.19409
Mouse	Neuron-enriched	Faim2	0.0166059	1.24813
Mouse	Neuron-enriched	Fbxw5
Mouse	Neuron-enriched	Flywch1	0.948696	1.1345
Mouse	Neuron-enriched	Gabarapl1
Mouse	Neuron-enriched	Gap43
Mouse	Neuron-enriched	Gpr162
Mouse	Neuron-enriched	Gria2	0.0166059	-1.16225
Mouse	Neuron-enriched	Gria3
Mouse	Neuron-enriched	Gria4	0.0166059	1.2353
Mouse	Neuron-enriched	Grin2b
Mouse	Neuron-enriched	Gtl2	0.0166059	-1.35344
Mouse	Neuron-enriched	Jakmip1	0.0166059	1.76982
Mouse	Neuron-enriched	Kifc2	0.776349	1.15759
Mouse	Neuron-enriched	Lba1
Mouse	Neuron-enriched	Lhx9
Mouse	Neuron-enriched	Lrp11
Mouse	Neuron-enriched	Madd
Mouse	Neuron-enriched	Map2k1	0.240375	1.09579
Mouse	Neuron-enriched	Map2k4	0.240375	1.12514
Mouse	Neuron-enriched	Myo5a	0.192757	1.15728
Mouse	Neuron-enriched	N28178	0.0166059	1.47077
Mouse	Neuron-enriched	Napb
Mouse	Neuron-enriched	Ndfip1	0.948696	-1.08826
Mouse	Neuron-enriched	Ndrg4
Mouse	Neuron-enriched	Nefl
Mouse	Neuron-enriched	Nsg2	0.0984834	1.23164
Mouse	Neuron-enriched	Pacsin1	0.0845758	1.11772
Mouse	Neuron-enriched	Prkaca
Mouse	Neuron-enriched	Prkar1b	0.0845758	1.11064
Mouse	Neuron-enriched	Rab6
Mouse	Neuron-enriched	Reps2	0.500155	1.14946
Mouse	Neuron-enriched	Rtn1	0.348192	-1.10985
Mouse	Neuron-enriched	Ryr2	0.0166059	1.31584
Mouse	Neuron-enriched	Sh3gl2
Mouse	Neuron-enriched	Slc22a17	0.0166059	-1.09994
Mouse	Neuron-enriched	Smarca2	0.0567437	1.25899
Mouse	Neuron-enriched	Snap25	0.288097	1.16731
Mouse	Neuron-enriched	Snrpn	0.0567437	-1.15758
Mouse	Neuron-enriched	Syngr3
Mouse	Neuron-enriched	Syp
Mouse	Neuron-enriched	Syt1
Mouse	Neuron-enriched	Tuba4	0.948696	1.0671
Mouse	Neuron-enriched	Uchl1
Mouse	Neuron-enriched	Ywhag
Mouse	Oligodendrocyte-enriched	2700055K07Rik
Mouse	Oligodendrocyte-enriched	4930570C03Rik
Mouse	Oligodendrocyte-enriched	6330503K22Rik
Mouse	Oligodendrocyte-enriched	A230069A22Rik	0.0166059	1.66664
Mouse	Oligodendrocyte-enriched	A330104H05Rik	0.0166059	1.67658
Mouse	Oligodendrocyte-enriched	Aatk	0.348192	1.28115
Mouse	Oligodendrocyte-enriched	Abca2
Mouse	Oligodendrocyte-enriched	Actc1
Mouse	Oligodendrocyte-enriched	Anln	0.0283489	1.63006
Mouse	Oligodendrocyte-enriched	Apod	0.0166059	2.24519
Mouse	Oligodendrocyte-enriched	Arhgef10
Mouse	Oligodendrocyte-enriched	Arrdc3	0.240375	1.22319
Mouse	Oligodendrocyte-enriched	BC030477	0.0166059	1.87182
Mouse	Oligodendrocyte-enriched	Car2
Mouse	Oligodendrocyte-enriched	Cd81	0.639002	1.15287
Mouse	Oligodendrocyte-enriched	Clic4	0.0166059	1.6617
Mouse	Oligodendrocyte-enriched	Cnp1	0.119564	1.26925
Mouse	Oligodendrocyte-enriched	Cntn2	0.0166059	1.36538
Mouse	Oligodendrocyte-enriched	Cryab	0.119564	1.26122
Mouse	Oligodendrocyte-enriched	Csrp1
Mouse	Oligodendrocyte-enriched	Daam2	0.0166059	1.2833
Mouse	Oligodendrocyte-enriched	Edg8
Mouse	Oligodendrocyte-enriched	Eef2
Mouse	Oligodendrocyte-enriched	Fa2h
Mouse	Oligodendrocyte-enriched	Fabp5
Mouse	Oligodendrocyte-enriched	Frmd4b	0.192757	1.50889
Mouse	Oligodendrocyte-enriched	Gatm	0.348192	1.2426
Mouse	Oligodendrocyte-enriched	Gjb1	0.348192	1.70462
Mouse	Oligodendrocyte-enriched	Gje1
Mouse	Oligodendrocyte-enriched	Gltp
Mouse	Oligodendrocyte-enriched	Gm98	0.500155	-1.16827
Mouse	Oligodendrocyte-enriched	Gpr37
Mouse	Oligodendrocyte-enriched	Gsn	0.0166059	1.65383
Mouse	Oligodendrocyte-enriched	Hcn2	0.500155	1.18194
Mouse	Oligodendrocyte-enriched	Hmgcs1	0.0845758	1.14404
Mouse	Oligodendrocyte-enriched	Lass2	0.348192	1.24207
Mouse	Oligodendrocyte-enriched	Mag	0.288097	1.31593
Mouse	Oligodendrocyte-enriched	Mal
Mouse	Oligodendrocyte-enriched	Map2k6
Mouse	Oligodendrocyte-enriched	Mbp	0.0283489	1.20775
Mouse	Oligodendrocyte-enriched	Mcam
Mouse	Oligodendrocyte-enriched	Mobp	0.0166059	1.46451
Mouse	Oligodendrocyte-enriched	Mog
Mouse	Oligodendrocyte-enriched	Mtrr
Mouse	Oligodendrocyte-enriched	Ndrg1	0.0166059	1.61484
Mouse	Oligodendrocyte-enriched	Npc1
Mouse	Oligodendrocyte-enriched	Nrbp2
Mouse	Oligodendrocyte-enriched	Olig1	0.119564	1.27535
Mouse	Oligodendrocyte-enriched	Olig2
Mouse	Oligodendrocyte-enriched	Omg
Mouse	Oligodendrocyte-enriched	Pacs2	0.348192	1.35278
Mouse	Oligodendrocyte-enriched	Pcyt2	0.0166059	1.33013
Mouse	Oligodendrocyte-enriched	Pex2
Mouse	Oligodendrocyte-enriched	Plekhb1	0.0166059	1.63137
Mouse	Oligodendrocyte-enriched	Plekhg3
Mouse	Oligodendrocyte-enriched	Ptgds
Mouse	Oligodendrocyte-enriched	Qdpr	0.146087	1.17929
Mouse	Oligodendrocyte-enriched	Qk	0.0166059	1.19154
Mouse	Oligodendrocyte-enriched	Rnf13
Mouse	Oligodendrocyte-enriched	S100a16	0.0166059	1.92232
Mouse	Oligodendrocyte-enriched	Scd2
Mouse	Oligodendrocyte-enriched	Scd3
Mouse	Oligodendrocyte-enriched	Sepp1	0.0166059	1.19341
Mouse	Oligodendrocyte-enriched	Serinc5
Mouse	Oligodendrocyte-enriched	Serpinb1a	0.776349	1.60496
Mouse	Oligodendrocyte-enriched	Sgk
Mouse	Oligodendrocyte-enriched	Sox10
Mouse	Oligodendrocyte-enriched	Syt11	0.348192	1.14786
Mouse	Oligodendrocyte-enriched	Taldo1	0.948696	1.17529
Mouse	Oligodendrocyte-enriched	Tegt	0.192757	1.1457
Mouse	Oligodendrocyte-enriched	Tmem10
Mouse	Oligodendrocyte-enriched	Tmem63a	0.348192	1.30286
Mouse	Oligodendrocyte-enriched	Tspan2	0.776349	1.27821
Mouse	Oligodendrocyte-enriched	Ttyh2	0.0394365	1.65493
Human	Astrocyte-enriched	ALDOC
Human	Astrocyte-enriched	APOE
Human	Astrocyte-enriched	AQP4	0.964805	1.51842
Human	Astrocyte-enriched	ATP1A2	0.549096	1.75901
Human	Astrocyte-enriched	BCAN
Human	Astrocyte-enriched	CLDN5
Human	Astrocyte-enriched	CLU	0.194919	1.19986
Human	Astrocyte-enriched	CSPG3
Human	Astrocyte-enriched	CST3
Human	Astrocyte-enriched	DBI
Human	Astrocyte-enriched	EDG1
Human	Astrocyte-enriched	EMX2	0.194919	1.70676
Human	Astrocyte-enriched	FLJ25530	0.139528	1.54461
Human	Astrocyte-enriched	GFAP	0.278664	1.97389
Human	Astrocyte-enriched	GJA1	0.740356	1.62049
Human	Astrocyte-enriched	GLDC
Human	Astrocyte-enriched	GLUL
Human	Astrocyte-enriched	GSN
Human	Astrocyte-enriched	ITGAM
Human	Astrocyte-enriched	ITGB5
Human	Astrocyte-enriched	MAGI1	0.0203962	-1.67468
Human	Astrocyte-enriched	PLA2G7
Human	Astrocyte-enriched	PPAP2B	0.139528	1.69719
Human	Astrocyte-enriched	PRDX6	0.740356	1.4186
Human	Astrocyte-enriched	SELPLG
Human	Astrocyte-enriched	SPARC
Human	Astrocyte-enriched	SPARCL1
Human	Choroid Plexus-enriched	ACAD8	0.0348594	-1.22575
Human	Choroid Plexus-enriched	ALS2CR4	0.194919	-1.22136
Human	Choroid Plexus-enriched	ATP6V0E
Human	Choroid Plexus-enriched	C21orf62
Human	Choroid Plexus-enriched	C6orf206
Human	Choroid Plexus-enriched	CAB39L
Human	Choroid Plexus-enriched	CALML4
Human	Choroid Plexus-enriched	CCND3
Human	Choroid Plexus-enriched	CFH
Human	Choroid Plexus-enriched	CLDN1
Human	Choroid Plexus-enriched	COL8A1
Human	Choroid Plexus-enriched	COL8A2
Human	Choroid Plexus-enriched	CSRP2
Human	Choroid Plexus-enriched	CTSC
Human	Choroid Plexus-enriched	ECRG4
Human	Choroid Plexus-enriched	ELOVL7
Human	Choroid Plexus-enriched	EPHX1	0.0646032	1.81562
Human	Choroid Plexus-enriched	F13A1
Human	Choroid Plexus-enriched	FADS1
Human	Choroid Plexus-enriched	FLJ21986
Human	Choroid Plexus-enriched	FOLR1
Human	Choroid Plexus-enriched	FXYD1	0.740356	1.60817
Human	Choroid Plexus-enriched	GGH	0.0203962	-1.3706
Human	Choroid Plexus-enriched	ITGB5
Human	Choroid Plexus-enriched	KDR
Human	Choroid Plexus-enriched	KIF9
Human	Choroid Plexus-enriched	KL
Human	Choroid Plexus-enriched	LEPR
Human	Choroid Plexus-enriched	LGALS3BP
Human	Choroid Plexus-enriched	LOC441762
Human	Choroid Plexus-enriched	LUM
Human	Choroid Plexus-enriched	MSX1
Human	Choroid Plexus-enriched	MXRA8
Human	Choroid Plexus-enriched	MYO7A
Human	Choroid Plexus-enriched	NID2
Human	Choroid Plexus-enriched	NOTCH2	0.0348594	1.67304
Human	Choroid Plexus-enriched	NXN
Human	Choroid Plexus-enriched	PBXIP1	0.0900293	1.75514
Human	Choroid Plexus-enriched	PCOLCE2
Human	Choroid Plexus-enriched	PERP
Human	Choroid Plexus-enriched	PGCP	0.740356	1.43017
Human	Choroid Plexus-enriched	PLTP	0.549096	1.46977
Human	Choroid Plexus-enriched	PRLR
Human	Choroid Plexus-enriched	RBP1
Human	Choroid Plexus-enriched	RNASET2
Human	Choroid Plexus-enriched	SLC26A11
Human	Choroid Plexus-enriched	SLCO1C1
Human	Choroid Plexus-enriched	SPINT2
Human	Choroid Plexus-enriched	SULF1
Human	Choroid Plexus-enriched	SYNE2
Human	Choroid Plexus-enriched	TXNIP	0.549096	3.29594
Human	Choroid Plexus-enriched	VIL2
Human	Choroid Plexus-enriched	WFDC2
Human	Near Ubiquitious	ACTB
Human	Near Ubiquitious	ALAS1	0.0348594	-1.40501
Human	Near Ubiquitious	APOE
Human	Near Ubiquitious	APP
Human	Near Ubiquitious	ATP5B	0.0203962	-1.50571
Human	Near Ubiquitious	ATP6V0B	0.0203962	-1.44459
Human	Near Ubiquitious	BRP44	0.0203962	-1.58793
Human	Near Ubiquitious	C15orf17	0.278664	-1.29137
Human	Near Ubiquitious	C1orf91
Human	Near Ubiquitious	C3orf37	0.0900293	-1.27645
Human	Near Ubiquitious	C6orf111
Human	Near Ubiquitious	CALCOCO1
Human	Near Ubiquitious	CCNT2
Human	Near Ubiquitious	CENPF
Human	Near Ubiquitious	CHST12
Human	Near Ubiquitious	CTSD
Human	Near Ubiquitious	DNAJC11
Human	Near Ubiquitious	ENO2
Human	Near Ubiquitious	FBXO22
Human	Near Ubiquitious	FLJ21106
Human	Near Ubiquitious	FUS	0.0203962	-1.74274
Human	Near Ubiquitious	HABP4	0.740356	-1.17766
Human	Near Ubiquitious	HKR2
Human	Near Ubiquitious	ICK
Human	Near Ubiquitious	IFNAR1
Human	Near Ubiquitious	JUND
Human	Near Ubiquitious	KIAA1414
Human	Near Ubiquitious	LAMP1	0.0900293	1.32764
Human	Near Ubiquitious	LOC440085	0.740356	1.19818
Human	Near Ubiquitious	LOC441454	0.390124	1.3105
Human	Near Ubiquitious	LOC441456	0.390124	1.3105
Human	Near Ubiquitious	MAPRE3	0.0203962	-1.4865
Human	Near Ubiquitious	MUS81
Human	Near Ubiquitious	NEU3
Human	Near Ubiquitious	P4HB
Human	Near Ubiquitious	PCYT2
Human	Near Ubiquitious	PEX16
Human	Near Ubiquitious	PSAP
Human	Near Ubiquitious	PTGFRN	0.0203962	-1.45607
Human	Near Ubiquitious	PTMA	0.390124	1.3105
Human	Near Ubiquitious	RAB11B
Human	Near Ubiquitious	SFRS11
Human	Near Ubiquitious	SIX2
Human	Near Ubiquitious	SPAG9	0.549096	-1.18025
Human	Near Ubiquitious	SQSTM1
Human	Near Ubiquitious	SRRM1
Human	Near Ubiquitious	TNFAIP6
Human	Near Ubiquitious	TUBA3	0.0203962	-1.27123
Human	Near Ubiquitious	UBE2C
Human	Neuron-enriched	ADD2	0.0203962	-1.44061
Human	Neuron-enriched	ALCAM
Human	Neuron-enriched	ATP6V1G2	0.0203962	-1.55921
Human	Neuron-enriched	BEX2	0.0348594	-1.27905
Human	Neuron-enriched	C16orf45
Human	Neuron-enriched	CALM2	0.0348594	-1.15469
Human	Neuron-enriched	CAMK2A
Human	Neuron-enriched	CAMK2B	0.139528	-1.28487
Human	Neuron-enriched	CHGB	0.0203962	-1.8664
Human	Neuron-enriched	CHST1	0.0203962	-1.29124
Human	Neuron-enriched	CLSTN3	0.0203962	-1.78565
Human	Neuron-enriched	CPLX1
Human	Neuron-enriched	CX3CL1	0.0203962	-1.5627
Human	Neuron-enriched	CYFIP2	0.390124	-1.20265
Human	Neuron-enriched	DPP6	0.0203962	-1.61705
Human	Neuron-enriched	EGR1	0.0203962	-1.87357
Human	Neuron-enriched	FAIM2	0.278664	-1.30986
Human	Neuron-enriched	FAM49A	0.0203962	-1.95488
Human	Neuron-enriched	FBXW5	0.0203962	-1.23156
Human	Neuron-enriched	FLYWCH1
Human	Neuron-enriched	GABARAPL1	0.0203962	-2.23869
Human	Neuron-enriched	GAP43	0.0203962	-1.73925
Human	Neuron-enriched	GRIA2	0.139528	-1.29592
Human	Neuron-enriched	GRIA3
Human	Neuron-enriched	GRIA4	0.0203962	-1.74721
Human	Neuron-enriched	GRIN2B
Human	Neuron-enriched	HMP19	0.0203962	-1.59038
Human	Neuron-enriched	KIAA0738	0.0203962	-1.26587
Human	Neuron-enriched	KIAA1045	0.0203962	-1.52469
Human	Neuron-enriched	KIFC2
Human	Neuron-enriched	LKAP
Human	Neuron-enriched	LRP11	0.0203962	-1.388
Human	Neuron-enriched	MADD	0.0203962	-1.29099
Human	Neuron-enriched	MAP2K1
Human	Neuron-enriched	MAP2K4	0.0203962	-1.83847
Human	Neuron-enriched	MARLIN1	0.0646032	-1.36117
Human	Neuron-enriched	MYO5A	0.0203962	-1.76616
Human	Neuron-enriched	NAPB
Human	Neuron-enriched	NDRG4	0.549096	-1.21167
Human	Neuron-enriched	NEFL	0.0203962	-1.78399
Human	Neuron-enriched	PACSIN1	0.0203962	-1.43478
Human	Neuron-enriched	PRKACA
Human	Neuron-enriched	PRKAR1B	0.390124	-1.35133
Human	Neuron-enriched	PTPRN	0.0348594	-1.33126
Human	Neuron-enriched	RAB6A	0.0203962	-2.1964
Human	Neuron-enriched	RAB6C	0.0203962	-1.27948
Human	Neuron-enriched	REPS2	0.0203962	-1.52686
Human	Neuron-enriched	RTN1	0.0203962	-1.34902
Human	Neuron-enriched	RYR2	0.549096	-1.33735
Human	Neuron-enriched	SH3GL2
Human	Neuron-enriched	SLC22A17
Human	Neuron-enriched	SMARCA2	0.0203962	-1.70748
Human	Neuron-enriched	SNAP25	0.0203962	-1.85811
Human	Neuron-enriched	SNRPN	0.0203962	-1.73753
Human	Neuron-enriched	SYNGR3	0.0203962	-1.66102
Human	Neuron-enriched	SYP
Human	Neuron-enriched	SYT1
Human	Neuron-enriched	TUBA1	0.0203962	-1.48602
Human	Neuron-enriched	UCHL1	0.0348594	-1.30181
Human	Neuron-enriched	YWHAG	0.0646032	-1.22502
Human	Oligodendrocyte-enriched	ABCA2
Human	Oligodendrocyte-enriched	ACTC
Human	Oligodendrocyte-enriched	ANLN
Human	Oligodendrocyte-enriched	APOD	0.0348594	2.25075
Human	Oligodendrocyte-enriched	ARHGEF10
Human	Oligodendrocyte-enriched	C11orf9
Human	Oligodendrocyte-enriched	CA2
Human	Oligodendrocyte-enriched	CD81	0.0900293	1.29639
Human	Oligodendrocyte-enriched	CLIC4
Human	Oligodendrocyte-enriched	CNP	0.964805	2.01959
Human	Oligodendrocyte-enriched	CNTN2
Human	Oligodendrocyte-enriched	CP110
Human	Oligodendrocyte-enriched	CRYAB	0.139528	2.22455
Human	Oligodendrocyte-enriched	CSRP1	0.0348594	1.65943
Human	Oligodendrocyte-enriched	DAAM2
Human	Oligodendrocyte-enriched	EEF2
Human	Oligodendrocyte-enriched	FA2H	0.549096	2.03857
Human	Oligodendrocyte-enriched	FABP5
Human	Oligodendrocyte-enriched	FRMD4B
Human	Oligodendrocyte-enriched	GATM
Human	Oligodendrocyte-enriched	GLTP
Human	Oligodendrocyte-enriched	GSN
Human	Oligodendrocyte-enriched	HCN2
Human	Oligodendrocyte-enriched	HMGCS1	0.0203962	-1.83063
Human	Oligodendrocyte-enriched	HSUP1
Human	Oligodendrocyte-enriched	KIAA1189
Human	Oligodendrocyte-enriched	MAG
Human	Oligodendrocyte-enriched	MAL
Human	Oligodendrocyte-enriched	MAP2K6
Human	Oligodendrocyte-enriched	MBP	0.964805	1.84465
Human	Oligodendrocyte-enriched	MCAM
Human	Oligodendrocyte-enriched	MOBP
Human	Oligodendrocyte-enriched	MOG
Human	Oligodendrocyte-enriched	MTRR
Human	Oligodendrocyte-enriched	NDRG1	0.0646032	1.62802
Human	Oligodendrocyte-enriched	NPC1
Human	Oligodendrocyte-enriched	NRBP2
Human	Oligodendrocyte-enriched	OLIG1
Human	Oligodendrocyte-enriched	OLIG2
Human	Oligodendrocyte-enriched	OMG
Human	Oligodendrocyte-enriched	PACS2
Human	Oligodendrocyte-enriched	PCYT2
Human	Oligodendrocyte-enriched	PEX5L
Human	Oligodendrocyte-enriched	PLEKHB1	0.0646032	2.12097
Human	Oligodendrocyte-enriched	PTGDS
Human	Oligodendrocyte-enriched	QDPR
Human	Oligodendrocyte-enriched	QKI	0.278664	1.49384
Human	Oligodendrocyte-enriched	S100A16
Human	Oligodendrocyte-enriched	SEPP1	0.390124	1.77833
Human	Oligodendrocyte-enriched	SGK	0.0348594	2.15309
Human	Oligodendrocyte-enriched	SOX10
Human	Oligodendrocyte-enriched	SYT11	0.964805	-1.25843
Human	Oligodendrocyte-enriched	TALDO1
Human	Oligodendrocyte-enriched	TEGT
Human	Oligodendrocyte-enriched	TMEM10
Human	Oligodendrocyte-enriched	TSPAN2
Human	Oligodendrocyte-enriched	TTYH2
