# Supplementary material for: Evolution of the Aging Brain Transcriptome and Synaptic Regulation
Source: PLoS One. 2008 Oct 2;3(10):e3329. doi: 10.1371/journal.pone.0003329 (PMC2553198; doi:10.1371/journal.pone.0003329)
Supplement: Table S9 — Calculations for Determining Significant Cell-Type Enrichment of Age-Regulated Genes (0.03 MB XLS) [file pone.0003329.s013.xls]

## Sheet: Sheet1
Table S9: Calculations for Determining Significant Cell-Type Enrichment of Age-Regulated Genes
The tables below contain the significance calculations for mouse (a) and human (b)
For each species, the "OBSERVED" table tallies the number of genes enriched in specific neuronal cell-types and either up-regulated, down-regulated or not significantly changed with age (no change). The "EXPECTED" table estimates the number of genes that are expected in each cell-type to be either up-regulated, down-regulated or not significantly changed with age (no change). For example, if we a…
combination. The (OBSERVED/EXPECTED) table divides the value in a cell in the OBSERVED table by the value in the corresponding cell in the EXPECTED table. When the expression change (denoted by the column) is independent from the cell-type enrichment (denoted by the row), then this value will center around 1. However, when expression change and cell-type are not independent, this value will be si…
a. Mouse
OBSERVED
		up-regulated	down-regulated	no change	total
	Astrocyte-enriched	24	1	14	39
	Choroid Plexus-enriched	25	8	60	93
	Near Ubiquitious	23	5	60	88
	Neuron-enriched	28	10	28	66
	Oligodendrocyte-enriched	39	1	34	74
	Total	139	25	196	360
EXPECTED
		up-regulated	down-regulated	no change	total
	Astrocyte-enriched	15.0583	2.70833	21.2333	39
	Choroid Plexus-enriched	35.9083	6.45833	50.6333	93
	Near Ubiquitious	33.9778	6.11111	47.9111	88
	Neuron-enriched	25.4833	4.58333	35.9333	66
	Oligodendrocyte-enriched	28.5722	5.13889	40.2889	74
	Total	139	25	196	360
(OBSERVED/EXPECTED)
		up-regulated	down-regulated	no change
	Astrocyte-enriched	1.5938	0.369231	0.659341
	Choroid Plexus-enriched	0.696217	1.23871	1.18499
	Near Ubiquitious	0.676913	0.818182	1.25232
	Neuron-enriched	1.09876	2.18182	0.779221
	Oligodendrocyte-enriched	1.36496	0.194595	0.843905
b. Human
OBSERVED
		up-regulated	down-regulated	no change	total
	Astrocyte-enriched	9	1	17	27
	Choroid Plexus-enriched	7	3	43	53
	Near Ubiquitious	5	12	32	49
	Neuron-enriched	0	44	16	60
	Oligodendrocyte-enriched	12	2	43	57
	Total	33	62	151	246
EXPECTED
		up-regulated	down-regulated	no change	total
	Astrocyte-enriched	3.62195	6.80488	16.5732	27
	Choroid Plexus-enriched	7.10976	13.3577	32.5325	53
	Near Ubiquitious	6.57317	12.3496	30.0772	49
	Neuron-enriched	8.04878	15.122	36.8293	60
	Oligodendrocyte-enriched	7.64634	14.3659	34.9878	57
	Total	33	62	151	246
(OBSERVED/EXPECTED)
		up-regulated	down-regulated	no change
	Astrocyte-enriched	2.48485	0.146953	1.02575
	Choroid Plexus-enriched	0.984563	0.224589	1.32175
	Near Ubiquitious	0.760668	0.971692	1.06393
	Neuron-enriched	0	2.90968	0.434437
	Oligodendrocyte-enriched	1.56938	0.139219	1.229
