# Supplementary material for: Evolution of the Aging Brain Transcriptome and Synaptic Regulation
Source: PLoS One. 2008 Oct 2;3(10):e3329. doi: 10.1371/journal.pone.0003329 (PMC2553198; doi:10.1371/journal.pone.0003329)
Supplement: Table S10 — Gene Ontology Enrichment Analysis of Human and Mouse Expression Data (0.05 MB XLS) [file pone.0003329.s014.xls]

## Sheet: supp_table4b
Table S10: Gene Ontology Enrichment Analysis of Human and Mouse Expression Data
This table lists the Gene Ontology terms that were significantly enriched for age-regulated genes in mice and humans. Gene Ontology enrichment analysis was performed independently in both humans and mice using the dChip software. Enrichment of a Gene Ontology group is defined as having more significantly age-related genes than expected by chance. Similar to Table S9, the expected number of age-re…
The columns of the table are described below:
Column name	Description
Species	species in which the enriched GO term occurred
Gene Count	number of significant age-related genes that possessed the GO term
Gene Ontology Group	Official name of the GO term
Genome-Wide	# genes within the GO term/total # of genes
P-value	significance p-value
Species	Gene Count	Gene Ontology Group	Genome-wide	p-value
Human	4	2 iron, 2 sulfur cluster binding' genes	9/15079	0.002575
Human	7	acetyl-CoA catabolic process' genes	25/15079	0.001095
Human	9	acetyl-CoA metabolic process' genes	30/15079	0.000135
Human	8	aerobic respiration' genes	32/15079	0.001019
Human	14	ATP biosynthetic process' genes	49/15079	4e-06
Human	16	ATP metabolic process' genes	53/15079	0
Human	13	ATP synthesis coupled proton transport' genes	44/15079	6e-06
Human	17	ATPase activity, coupled to movement of substances' genes	131/15079	0.004092
Human	17	ATPase activity, coupled to transmembrane movement of ions' genes	89/15079	6.1e-05
Human	17	ATPase activity, coupled to transmembrane movement of substances' genes	130/15079	0.003799
Human	3	autophagic vacuole' genes	5/15079	0.003922
Human	4	axon extension' genes	6/15079	0.000588
Human	12	axonogenesis' genes	55/15079	0.000219
Human	138	biopolymer modification' genes	1642/15079	0.000157
Human	113	biosynthetic process' genes	1209/15079	1e-05
Human	17	calmodulin binding' genes	130/15079	0.003799
Human	350	catalytic activity' genes	5016/15079	0.003761
Human	50	cation transport' genes	492/15079	0.000583
Human	16	cation-transporting ATPase activity' genes	54/15079	0
Human	730	cell' genes	10943/15079	5.4e-05
Human	730	cell part' genes	10942/15079	5.3e-05
Human	15	cell part morphogenesis' genes	83/15079	0.000287
Human	14	cell projection' genes	97/15079	0.003554
Human	15	cell projection morphogenesis' genes	83/15079	0.000287
Human	15	cell projection organization and biogenesis' genes	83/15079	0.000287
Human	180	cellular component organization and biogenesis' genes	2122/15079	7e-06
Human	85	cellular localization' genes	794/15079	1e-06
Human	237	cellular macromolecule metabolic process' genes	2958/15079	1e-05
Human	13	cellular morphogenesis during differentiation' genes	59/15079	0.000111
Human	683	cellular process' genes	10416/15079	0.003769
Human	232	cellular protein metabolic process' genes	2914/15079	2.1e-05
Human	9	cellular respiration' genes	35/15079	0.000414
Human	19	central nervous system development' genes	122/15079	0.00031
Human	16	coenzyme biosynthetic process' genes	93/15079	0.000313
Human	7	coenzyme catabolic process' genes	28/15079	0.002068
Human	27	coenzyme metabolic process' genes	154/15079	2e-06
Human	17	cofactor biosynthetic process' genes	108/15079	0.000558
Human	8	cofactor catabolic process' genes	33/15079	0.001236
Human	29	cofactor metabolic process' genes	179/15079	5e-06
Human	314	cytoplasm' genes	3397/15079	0
Human	20	cytoplasmic membrane-bound vesicle' genes	162/15079	0.003401
Human	249	cytoplasmic part' genes	2466/15079	0
Human	20	cytoplasmic vesicle' genes	163/15079	0.003636
Human	39	cytoskeleton organization and biogenesis' genes	399/15079	0.004247
Human	39	cytosol' genes	350/15079	0.000432
Human	5	dendrite' genes	11/15079	0.000691
Human	5	dicarboxylic acid metabolic process' genes	10/15079	0.000452
Human	14	electron carrier activity' genes	76/15079	0.000375
Human	37	endomembrane system' genes	356/15079	0.001982
Human	13	energy coupled proton transport, down electrochemical gradient' genes	44/15079	6e-06
Human	13	energy derivation by oxidation of organic compounds' genes	75/15079	0.001031
Human	41	envelope' genes	284/15079	1e-06
Human	13	ER to Golgi vesicle-mediated transport' genes	68/15079	0.000425
Human	85	establishment of cellular localization' genes	786/15079	1e-06
Human	208	establishment of localization' genes	2320/15079	0
Human	70	establishment of protein localization' genes	637/15079	4e-06
Human	6	exosome/RNase complex' genes	21/15079	0.002215
Human	7	GABA receptor activity' genes	24/15079	0.000867
Human	6	GABA-A receptor activity' genes	21/15079	0.002215
Human	18	generation of neurons' genes	89/15079	1.8e-05
Human	54	generation of precursor metabolites and energy' genes	528/15079	0.000308
Human	47	Golgi apparatus' genes	482/15079	0.001896
Human	43	Golgi apparatus part' genes	423/15079	0.001363
Human	15	group transfer coenzyme metabolic process' genes	67/15079	2.8e-05
Human	5	growth cone' genes	10/15079	0.000452
Human	41	GTP binding' genes	346/15079	8.9e-05
Human	28	GTPase activity' genes	162/15079	2e-06
Human	41	guanyl nucleotide binding' genes	353/15079	0.000135
Human	20	hydrogen ion transporter activity' genes	106/15079	1.7e-05
Human	12	hydrogen ion transporting ATP synthase activity, rotational mechanism' genes	41/15079	1.4e-05
Human	13	hydrogen ion transporting ATPase activity, rotational mechanism' genes	42/15079	3e-06
Human	17	hydrogen transport' genes	74/15079	6e-06
Human	59	hydrolase activity, acting on acid anhydrides' genes	563/15079	8.8e-05
Human	18	hydrolase activity, acting on acid anhydrides, catalyzing transmembrane movement of substances' genes	133/15079	0.002067
Human	58	hydrolase activity, acting on acid anhydrides, in phosphorus-containing anhydrides' genes	560/15079	0.000136
Human	540	intracellular' genes	7630/15079	6e-06
Human	379	intracellular membrane-bound organelle' genes	5485/15079	0.004404
Human	446	intracellular organelle' genes	6304/15079	0.00014
Human	189	intracellular organelle part' genes	2186/15079	1e-06
Human	517	intracellular part' genes	7268/15079	7e-06
Human	48	intracellular protein transport' genes	409/15079	2.9e-05
Human	73	intracellular transport' genes	678/15079	5e-06
Human	65	ion transport' genes	714/15079	0.00157
Human	64	ion transporter activity' genes	676/15079	0.000665
Human	230	localization' genes	2534/15079	0
Human	191	macromolecular complex' genes	1979/15079	0
Human	72	macromolecule localization' genes	697/15079	2.3e-05
Human	38	magnesium ion binding' genes	311/15079	8.7e-05
Human	357	membrane' genes	4885/15079	9.9e-05
Human	380	membrane-bound organelle' genes	5487/15079	0.003703
Human	21	membrane-bound vesicle' genes	165/15079	0.001925
Human	10	microtubule cytoskeleton organization and biogenesis' genes	57/15079	0.00345
Human	22	microtubule' genes	179/15079	0.00232
Human	23	microtubule-based process' genes	172/15079	0.000636
Human	6	mitochondrial electron transport, NADH to ubiquinone genes	23/15079	0.00345
Human	27	mitochondrial envelope' genes	161/15079	5e-06
Human	22	mitochondrial inner membrane' genes	116/15079	6e-06
Human	27	mitochondrial membrane' genes	144/15079	1e-06
Human	15	mitochondrial membrane part' genes	51/15079	1e-06
Human	38	mitochondrial part' genes	239/15079	0
Human	4	mitochondrial proton-transporting ATP synthase complex' genes	10/15079	0.00374
Human	84	mitochondrion' genes	631/15079	0
Human	38	monovalent inorganic cation transport' genes	314/15079	0.000105
Human	21	monovalent inorganic cation transporter activity' genes	116/15079	1.9e-05
Human	11	NADH dehydrogenase/quinone activity' genes	43/15079	0.000103
Human	11	NADH dehydrogenase/ubiquinone activity' genes	43/15079	0.000103
Human	11	NADH dehydrogenase activity' genes	44/15079	0.000126
Human	3	negative regulation of neurogenesis' genes	4/15079	0.002102
Human	58	nervous system development' genes	478/15079	2e-06
Human	14	neurite development' genes	60/15079	3.4e-05
Human	13	neurite morphogenesis' genes	57/15079	7.9e-05
Human	18	neurogenesis' genes	90/15079	2.1e-05
Human	15	neuron development' genes	67/15079	2.8e-05
Human	17	neuron differentiation' genes	83/15079	2.6e-05
Human	13	neuron morphogenesis during differentiation' genes	57/15079	7.9e-05
Human	8	neuron projection' genes	23/15079	0.000117
Human	5	neuron recognition' genes	9/15079	0.00028
Human	14	nucleoside phosphate metabolic process' genes	49/15079	4e-06
Human	15	nucleoside triphosphate biosynthetic process' genes	64/15079	1.7e-05
Human	17	nucleoside triphosphate metabolic process' genes	70/15079	3e-06
Human	56	nucleoside-triphosphatase activity' genes	532/15079	0.000118
Human	154	nucleotide binding' genes	1947/15079	0.000933
Human	23	nucleotide biosynthetic process' genes	135/15079	2e-05
Human	28	nucleotide metabolic process' genes	191/15079	3.8e-05
Human	7	organelle ATP synthesis coupled electron transport' genes	30/15079	0.003019
Human	41	organelle envelope' genes	280/15079	1e-06
Human	447	organelle' genes	6306/15079	0.000112
Human	24	organelle inner membrane' genes	149/15079	3.2e-05
Human	65	organelle membrane' genes	521/15079	0
Human	190	organelle part' genes	2188/15079	1e-06
Human	3	ornithine decarboxylase inhibitor activity' genes	4/15079	0.002102
Human	21	oxidative phosphorylation' genes	80/15079	0
Human	15	oxidoreductase activity, acting on NADH or NADPH genes	70/15079	4.6e-05
Human	12	oxidoreductase activity, acting on NADH or NADPH, quinone or similar compound as acceptor genes	48/15079	6.3e-05
Human	83	phosphate metabolic process' genes	830/15079	1.7e-05
Human	32	phosphoric ester hydrolase activity' genes	310/15079	0.004237
Human	83	phosphorus metabolic process' genes	830/15079	1.7e-05
Human	67	phosphorylation' genes	676/15079	0.000147
Human	4	polyamine metabolic process' genes	10/15079	0.00374
Human	13	postsynaptic membrane' genes	76/15079	0.001159
Human	118	post-translational protein modification' genes	1344/15079	9.2e-05
Human	20	P-P-bond-hydrolysis-driven transporter activity' genes	99/15079	6e-06
Human	20	primary active transporter activity' genes	99/15079	6e-06
Human	359	protein binding' genes	4730/15079	3e-06
Human	152	protein complex' genes	1603/15079	0
Human	70	protein localization' genes	655/15079	1.1e-05
Human	243	protein metabolic process' genes	3058/15079	1.4e-05
Human	135	protein modification process' genes	1589/15079	0.000118
Human	69	protein transport' genes	613/15079	2e-06
Human	17	proton transport' genes	73/15079	5e-06
Human	6	proton-transporting ATP synthase complex' genes	16/15079	0.000561
Human	13	proton-transporting two-sector ATPase complex' genes	46/15079	9e-06
Human	4	proton-transporting two-sector ATPase complex, catalytic domain genes	8/15079	0.001687
Human	15	purine nucleoside triphosphate biosynthetic process' genes	62/15079	1.2e-05
Human	17	purine nucleoside triphosphate metabolic process' genes	66/15079	1e-06
Human	134	purine nucleotide binding' genes	1671/15079	0.001256
Human	18	purine nucleotide biosynthetic process' genes	80/15079	4e-06
Human	19	purine nucleotide metabolic process' genes	83/15079	2e-06
Human	15	purine ribonucleoside triphosphate biosynthetic process' genes	62/15079	1.2e-05
Human	17	purine ribonucleoside triphosphate metabolic process' genes	66/15079	1e-06
Human	18	purine ribonucleotide biosynthetic process' genes	76/15079	2e-06
Human	19	purine ribonucleotide metabolic process' genes	79/15079	1e-06
Human	58	pyrophosphatase activity' genes	557/15079	0.000118
Human	5	regulation of axonogenesis' genes	10/15079	0.000452
Human	7	regulation of neurogenesis' genes	15/15079	5.2e-05
Human	45	ribonucleoprotein complex' genes	437/15079	0.000829
Human	15	ribonucleoside triphosphate biosynthetic process' genes	62/15079	1.2e-05
Human	17	ribonucleoside triphosphate metabolic process' genes	66/15079	1e-06
Human	19	ribonucleotide biosynthetic process' genes	83/15079	2e-06
Human	20	ribonucleotide metabolic process' genes	88/15079	1e-06
Human	32	ribosome' genes	239/15079	6.1e-05
Human	26	secretion by cell' genes	228/15079	0.002703
Human	29	secretion' genes	253/15079	0.001481
Human	25	secretory pathway' genes	200/15079	0.000971
Human	5	site of polarized growth' genes	11/15079	0.000691
Human	38	small GTPase mediated signal transduction' genes	325/15079	0.000206
Human	8	small protein activating enzyme activity' genes	37/15079	0.002495
Human	33	structural constituent of ribosome' genes	239/15079	2.6e-05
Human	22	synapse' genes	123/15079	1.5e-05
Human	13	synapse part' genes	83/15079	0.002476
Human	46	translation' genes	486/15079	0.003638
Human	203	transport' genes	2277/15079	0
Human	7	tricarboxylic acid cycle' genes	25/15079	0.001095
Human	8	tricarboxylic acid cycle intermediate metabolic process' genes	22/15079	8.7e-05
Human	9	tubulin binding' genes	42/15079	0.001464
Human	53	ubiquitin cycle' genes	517/15079	0.000331
Human	21	vesicle' genes	166/15079	0.002066
Human	44	vesicle-mediated transport' genes	379/15079	7.9e-05
Mouse	4	aminopeptidase activity genes	36/15014	0.004785
Mouse	2	blastocyst hatching genes	4/15014	0.002603
Mouse	86	cytoplasm genes	3547/15014	0.003205
Mouse	2	hatching genes	4/15014	0.002603
Mouse	9	lysosome genes	128/15014	0.000736
Mouse	9	lytic vacuole genes	128/15014	0.000736
Mouse	3	misfolded or incompletely synthesized protein catabolic process genes	11/15014	0.001199
Mouse	2	positive regulation of exocytosis genes	4/15014	0.002603
Mouse	7	potassium ion binding genes	88/15014	0.001415
Mouse	3	protein import into nucleus, docking genes	15/15014	0.002879
Mouse	22	protein transport genes	636/15014	0.004054
Mouse	2	rhythmic behavior genes	4/15014	0.002603
Mouse	10	vacuole genes	147/15014	0.000489
