# Supplementary material for: Evolution of the Aging Brain Transcriptome and Synaptic Regulation
Source: PLoS One. 2008 Oct 2;3(10):e3329. doi: 10.1371/journal.pone.0003329 (PMC2553198; doi:10.1371/journal.pone.0003329)
Supplement: Table S12 — Antibodies employed in the analysis of cortical protein levels (0.02 MB XLS) [file pone.0003329.s016.xls]

## Sheet: Sheet1
Table S12. Antibodies employed in the analysis of cortical protein levels. The indicated antibodies were used at specified dilutions for quantitative Western blot analysis shown in Fig. 6 and Fig. S2.
Antibody	Source	Host	Catalogue Number	Dilution
α-GAD1	Millipore	mouse	MAB5406	1:5000
α-Calbindin-1	Millipore	rabbit	AB1778	1:5000
α-somatostatin	abcam	rabbit	AB53165	1:500
α-VIP	Santa Cruz Biotechnology	rabbit	sc-20727	1:1000
α-β-tubulin-III	Millipore	mouse	MAB1637	1:1500
α-actin	Sigma	rabbit	A2066	1:3000
α-neurofilament-L	Cell Signaling	rabbit	C28E10	1:1000
α-synaptophysin	Millipore	mouse	MAB5258	1:3000
